# Supplementary material for: Understanding the Significance of Biochemistry in the Storage, Handling, Purification, and Sampling of Amphiphilic Mycolactone
Source: MDPI journal article supplement (doi:10.3390/toxins11040202), 2019-04-04

# HPLC-grade Acetonitrile Blank

BLANK

31JAN2018\_MycoProject\_BLANK\_ACN\_01 1 (0.034)

1: TOF MS ES+  
5.87e4

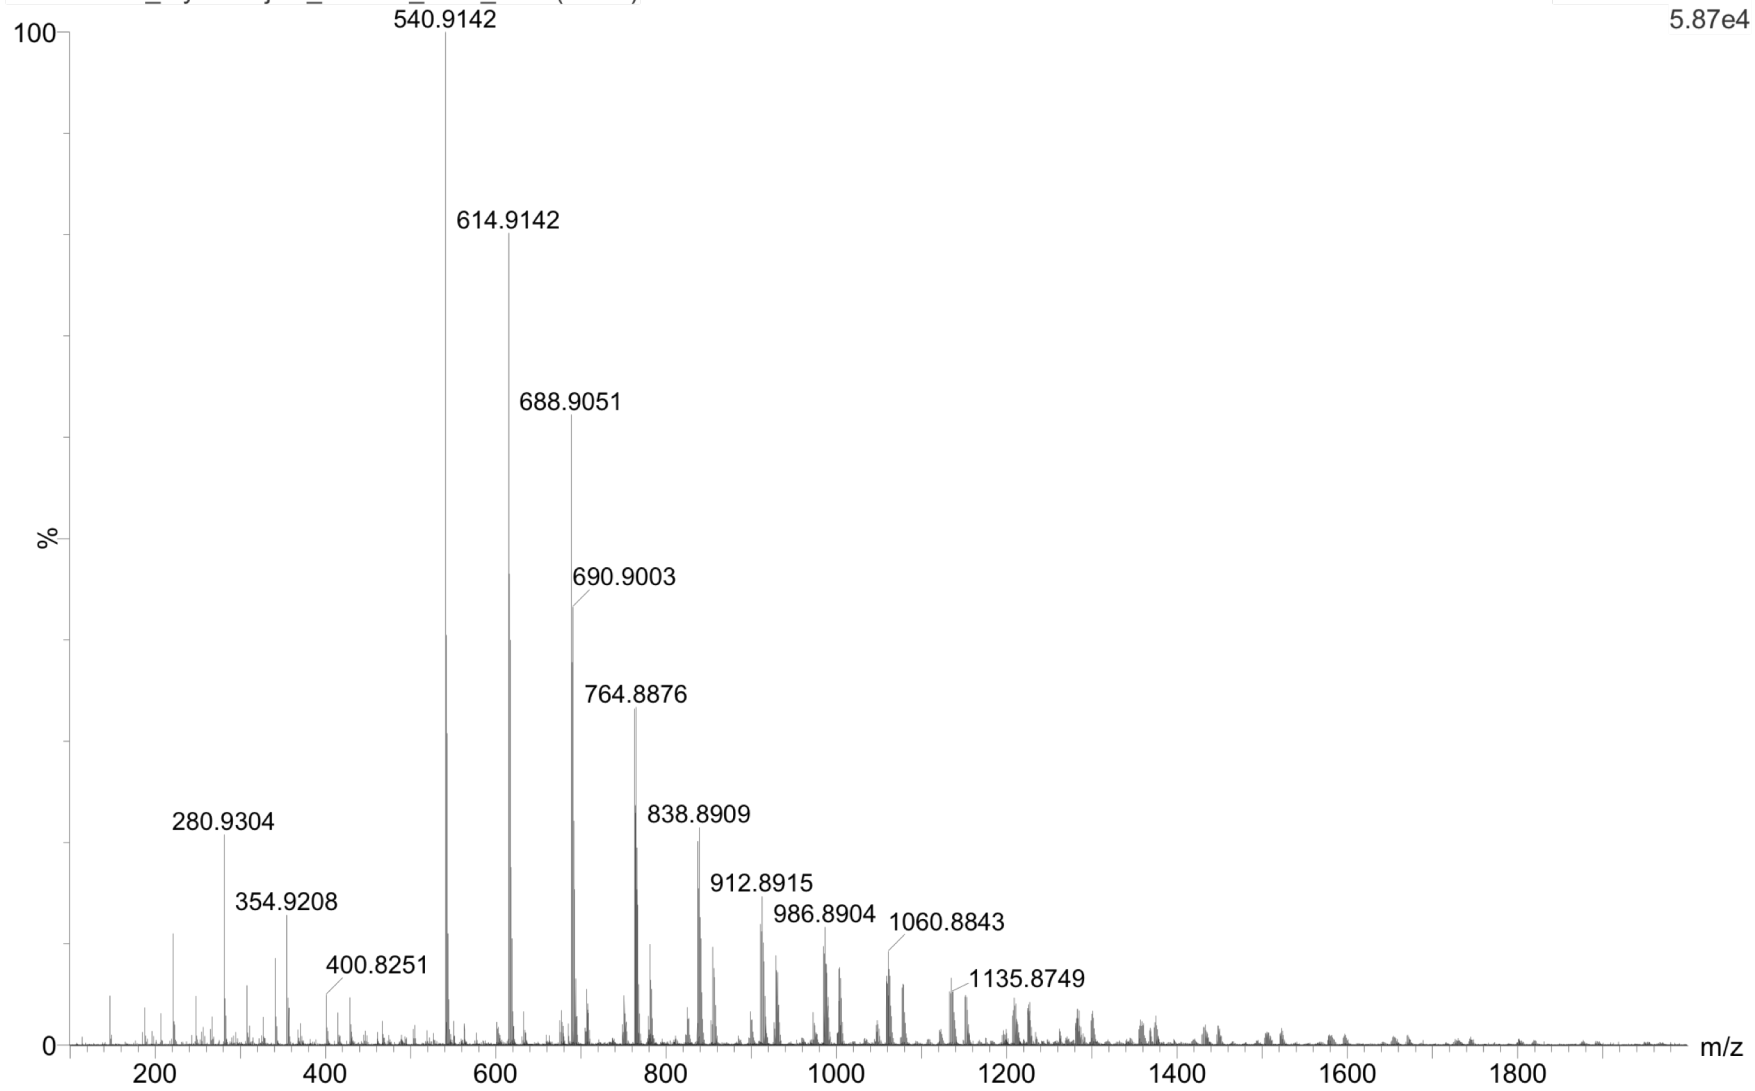

Sample #1  
TLC Purified

Myco PUR 1

31JAN2018\_MycoProject\_MYCO\_Purification1\_01 1 (0.034)

1: TOF MS ES+  
2.86e5

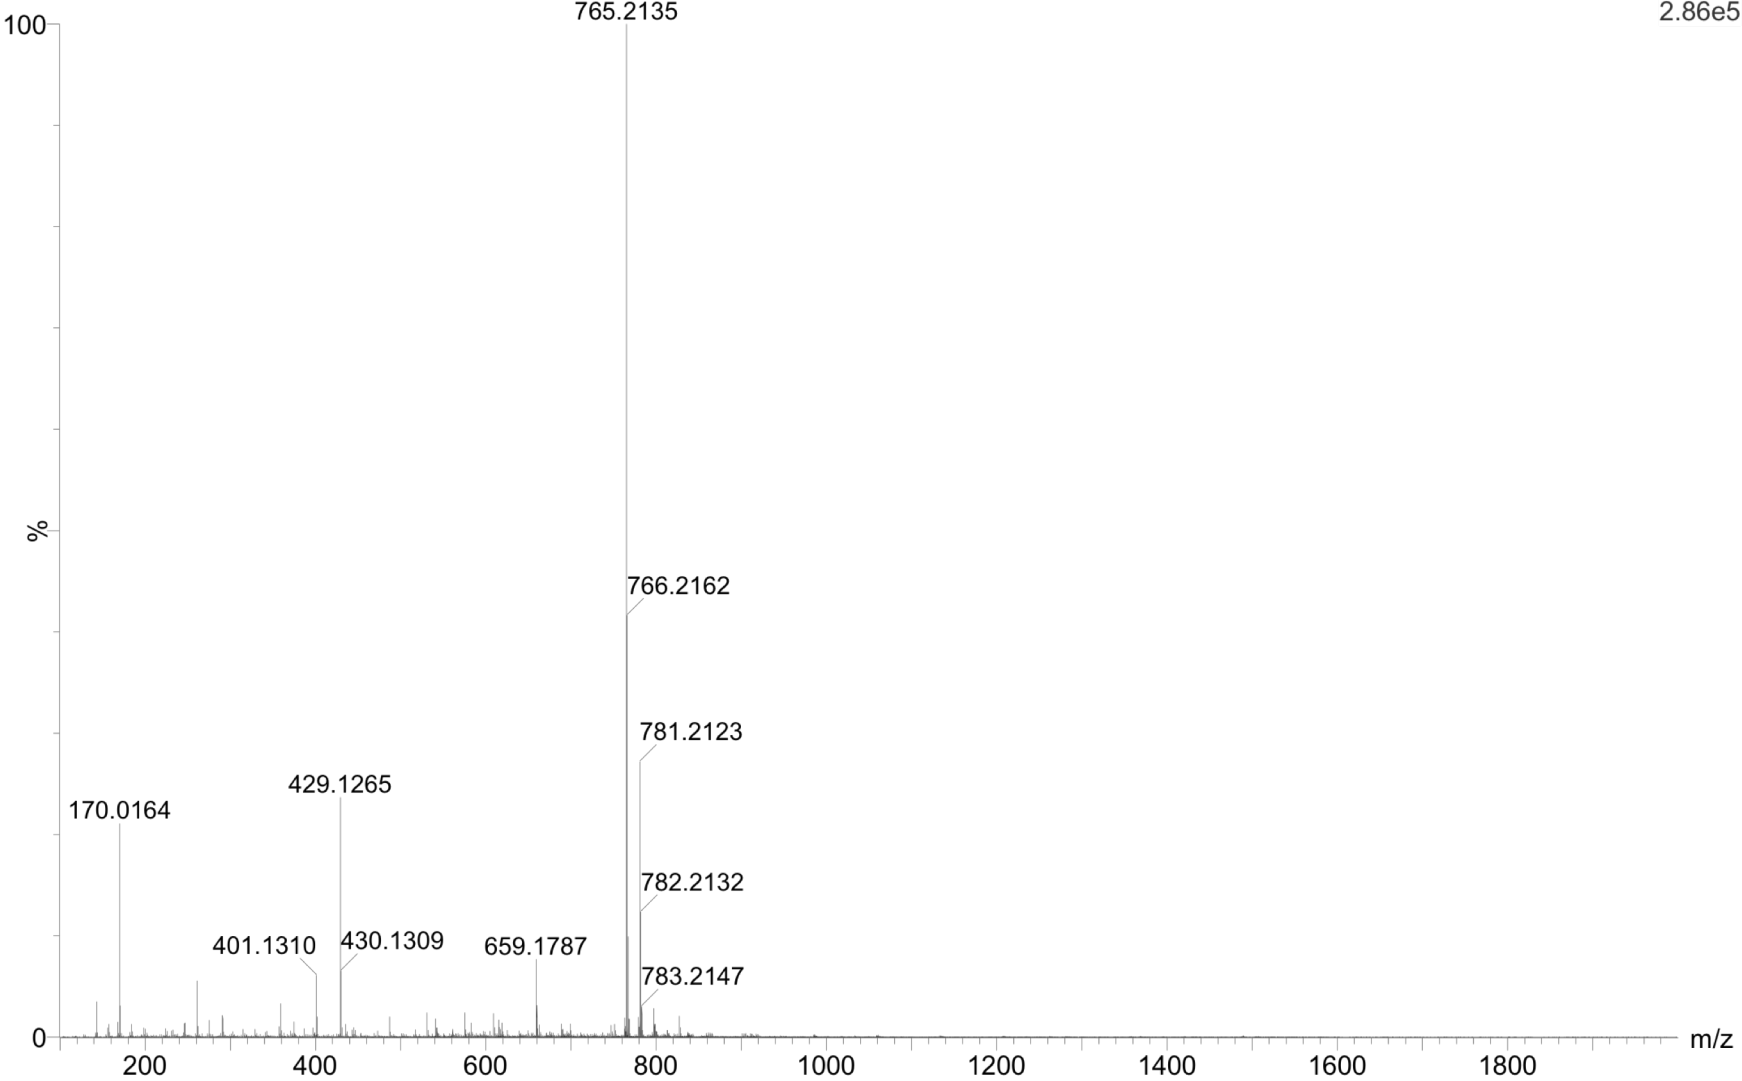

Sample #3  
TLC Purified

Myco PUR 3

31JAN2018\_MycoProject\_MYCO\_Purification3\_01 1 (0.034)

1: TOF MS ES+  
2.44e5

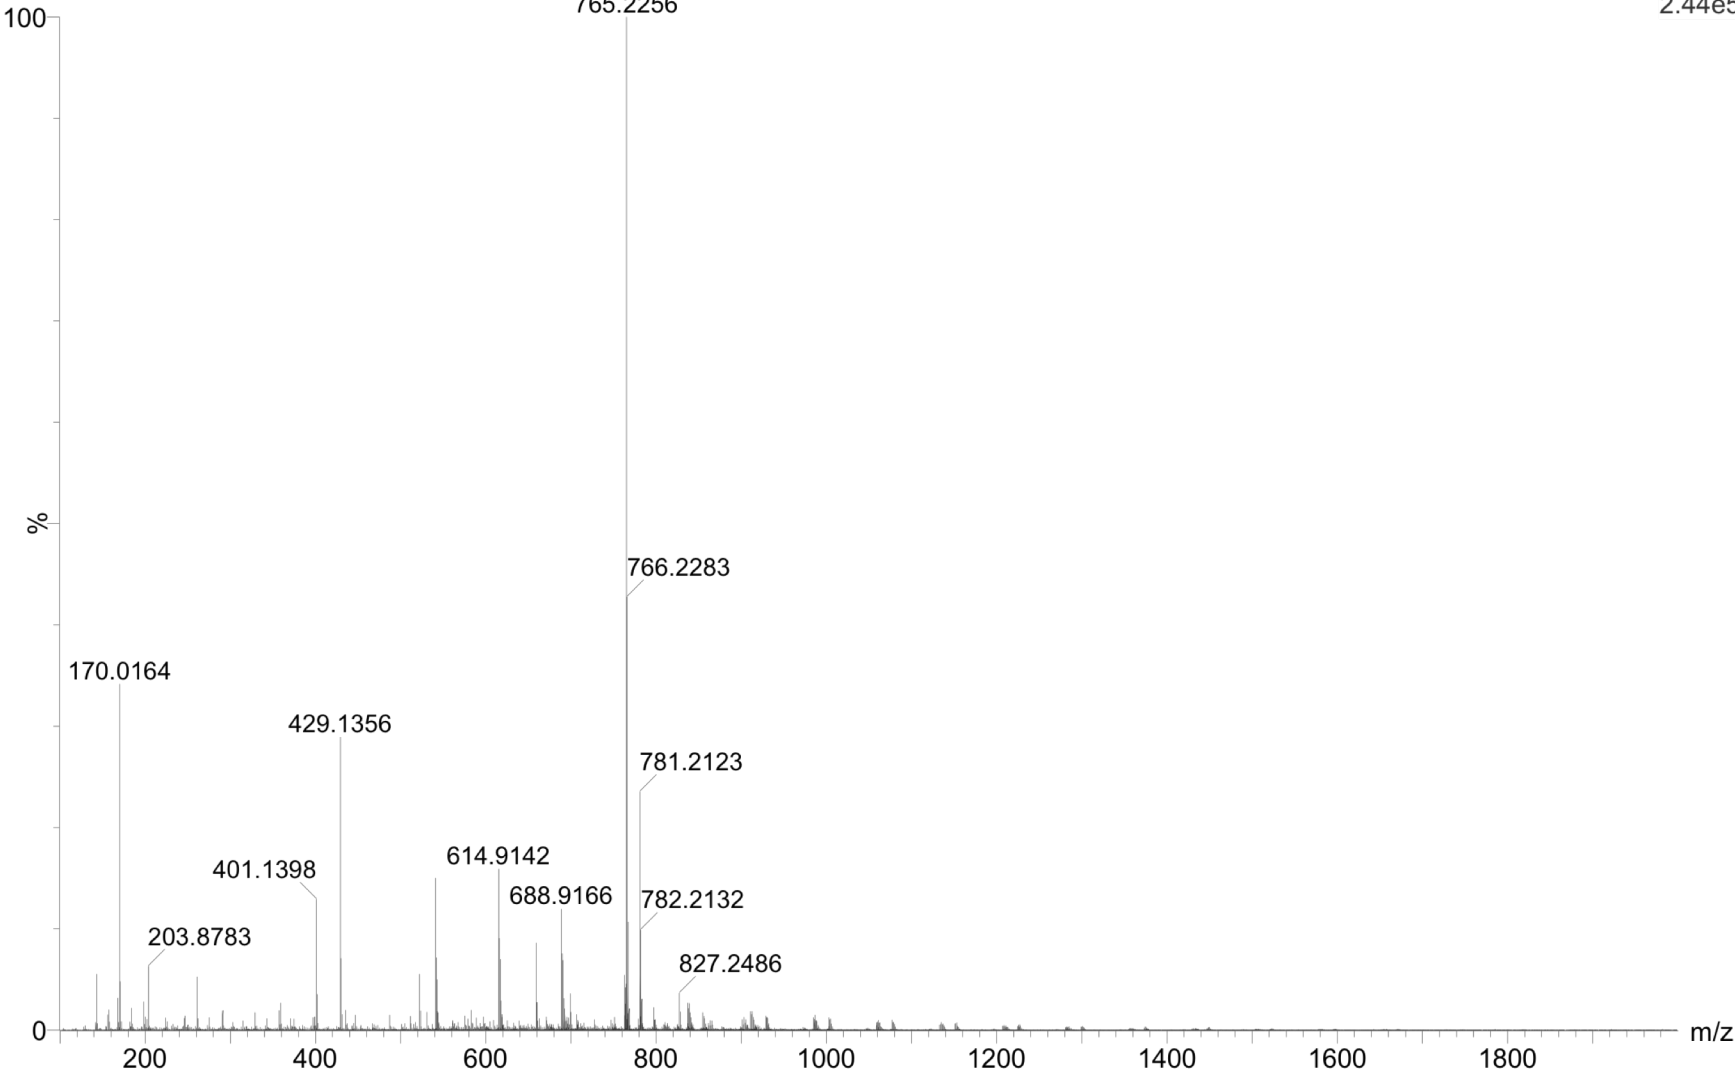

# Sample #5

## Ethanol Extract

07AUG2017\_MycoLProject\_PrePur\_5\_072417\_01 2 (0.051) Cm (2)

1: TOF MS ES+  
4.88e3

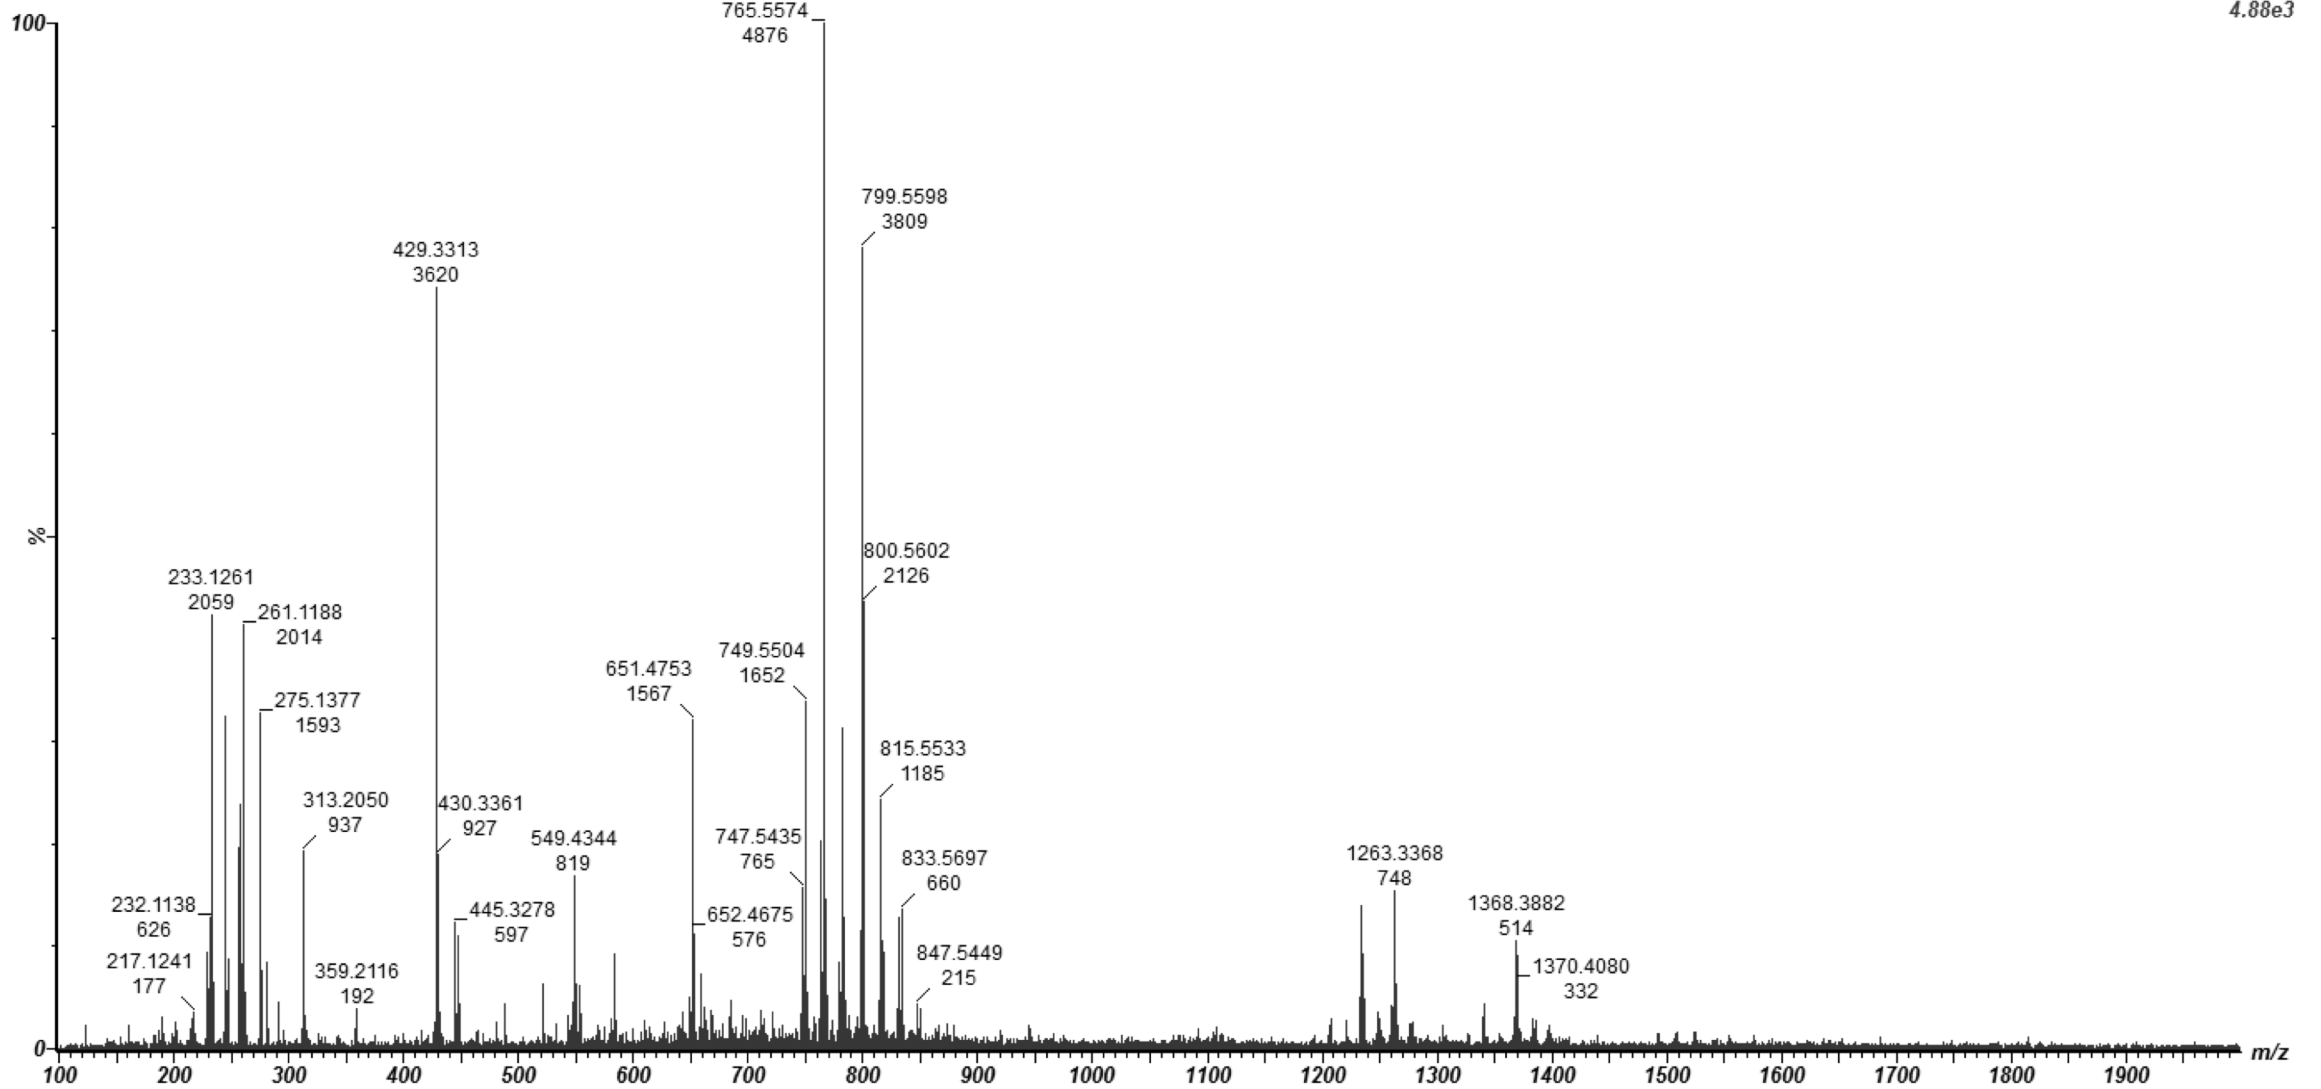

Sample #5  
TLC Purified

Myco PUR 5  
31JAN2018\_MycoProject\_MYCO\_Purification5\_01 1 (0.034)

1: TOF MS ES+  
5.19e4

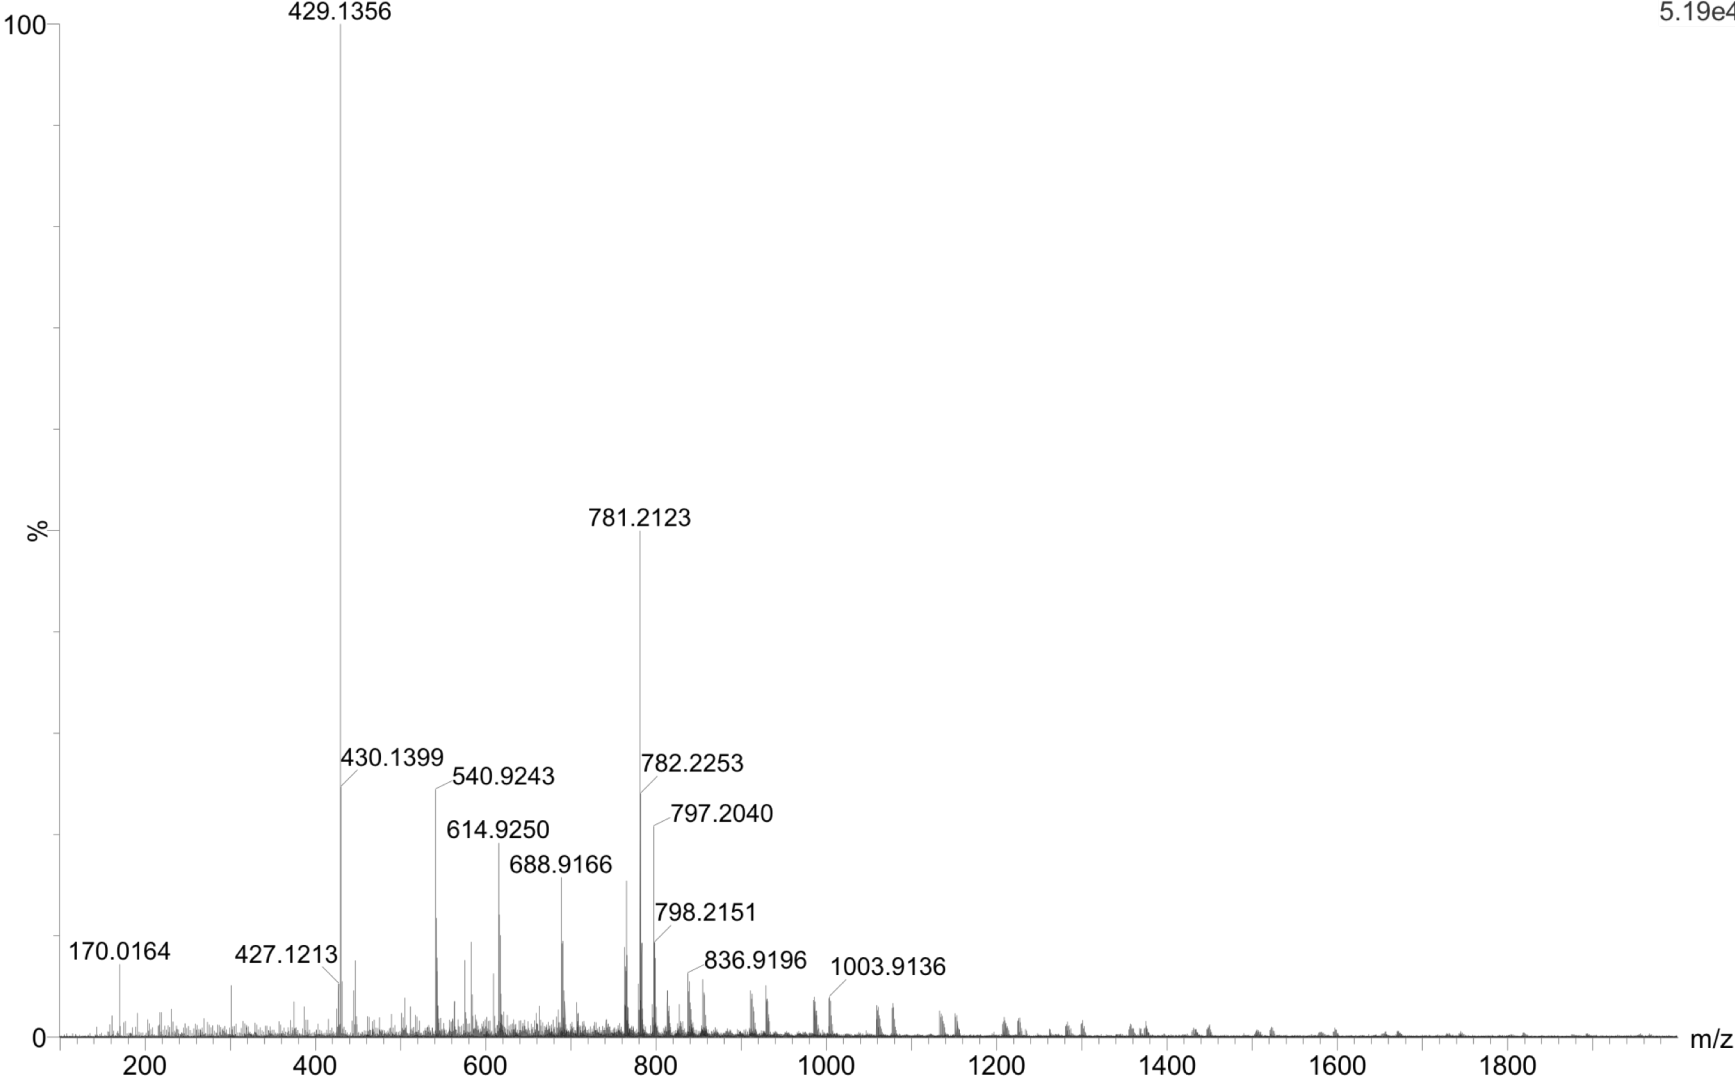

# Sample #6

## Ethanol Extract

07AUG2017\_MycoLProject\_PrePur\_6\_072417\_01 2 (0.051) Cm (2)

1: TOF MS ES+  
4.90e4

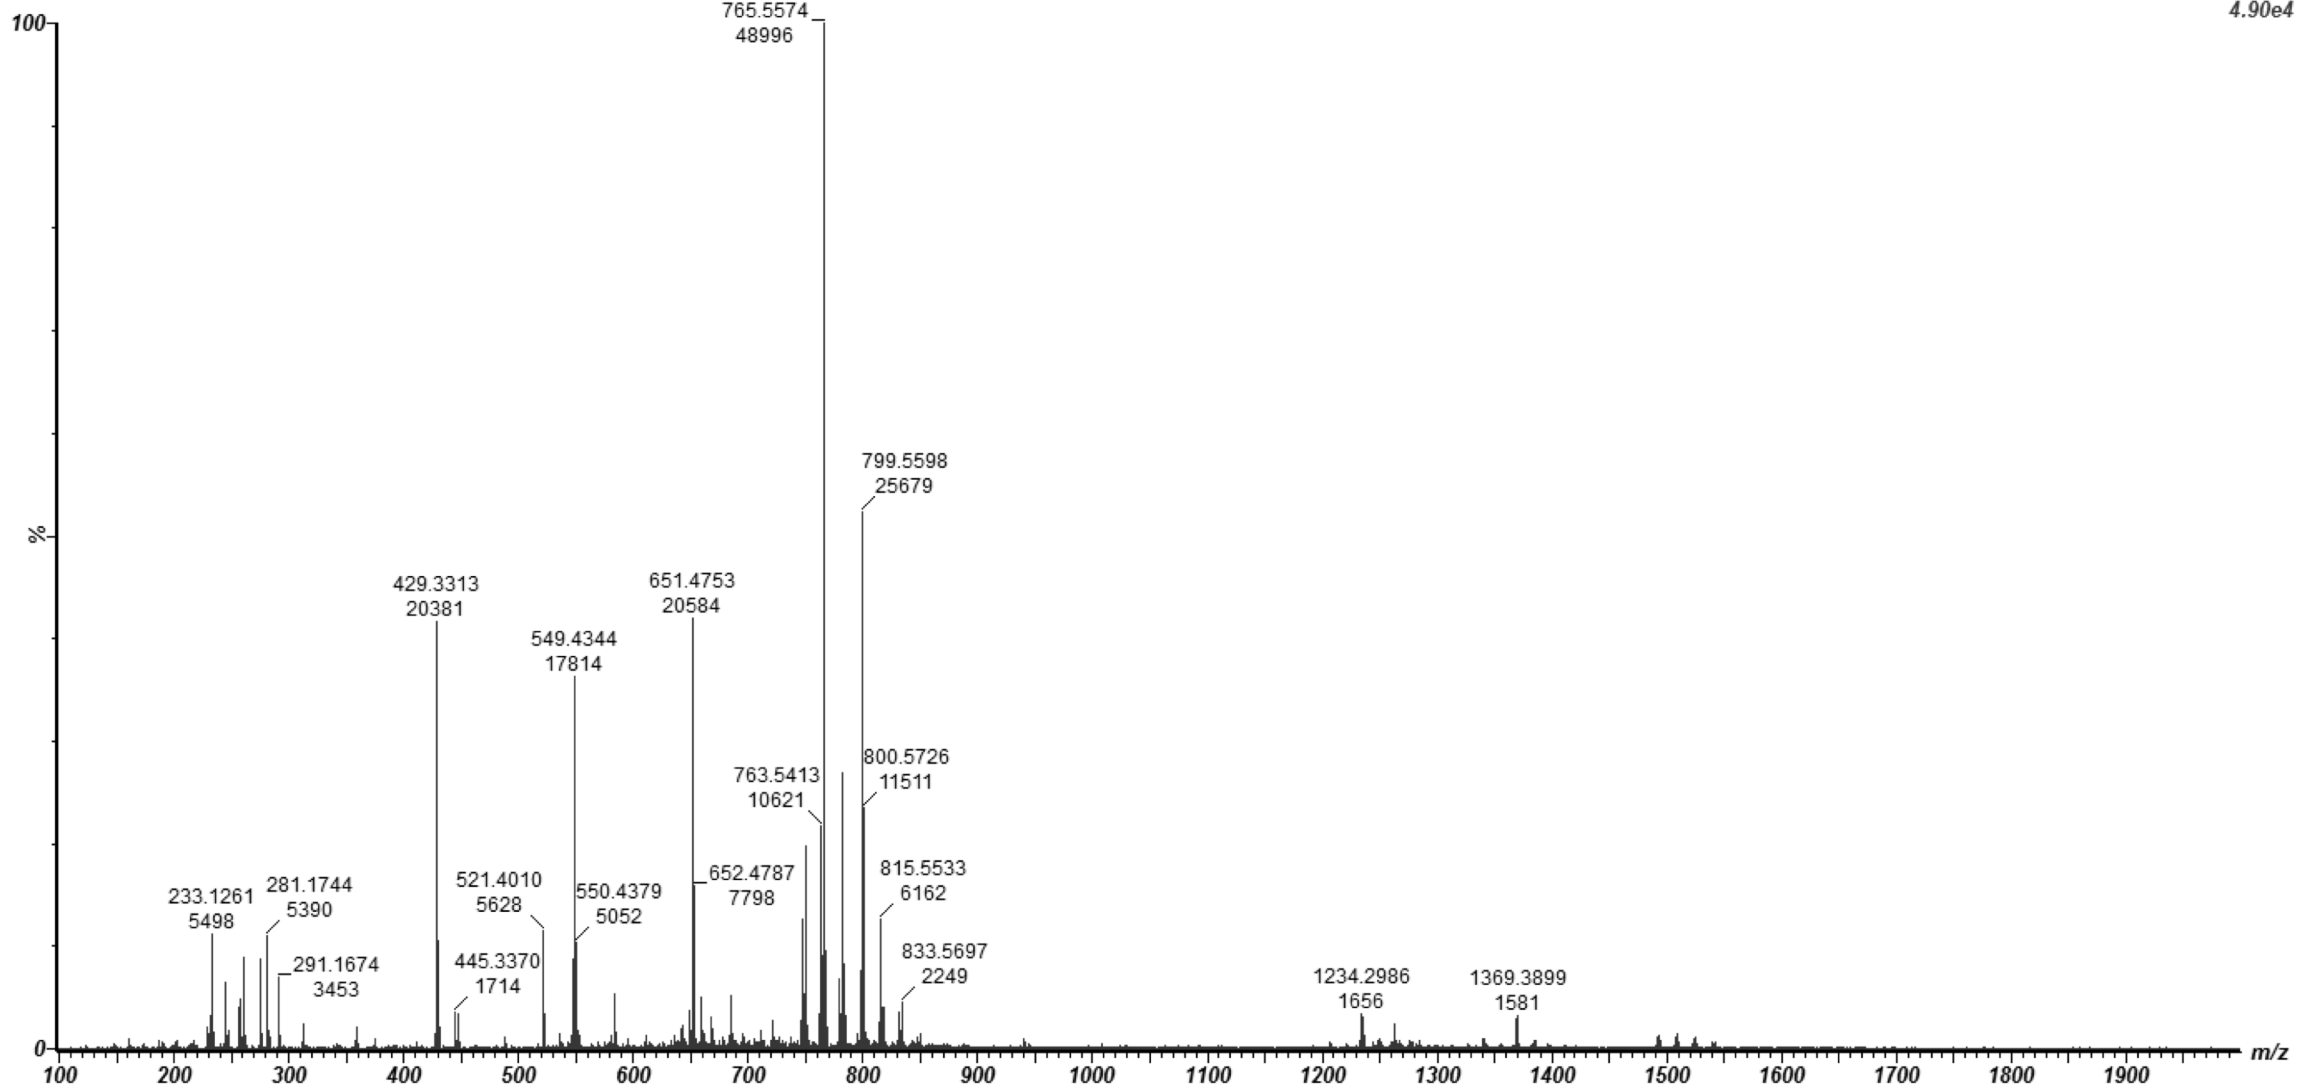

Sample #6  
TLC Purified

Myco PUR 6  
31JAN2018\_MycoProject\_MYCO\_Purification6\_01 1 (0.034)

1: TOF MS ES+  
7.56e3

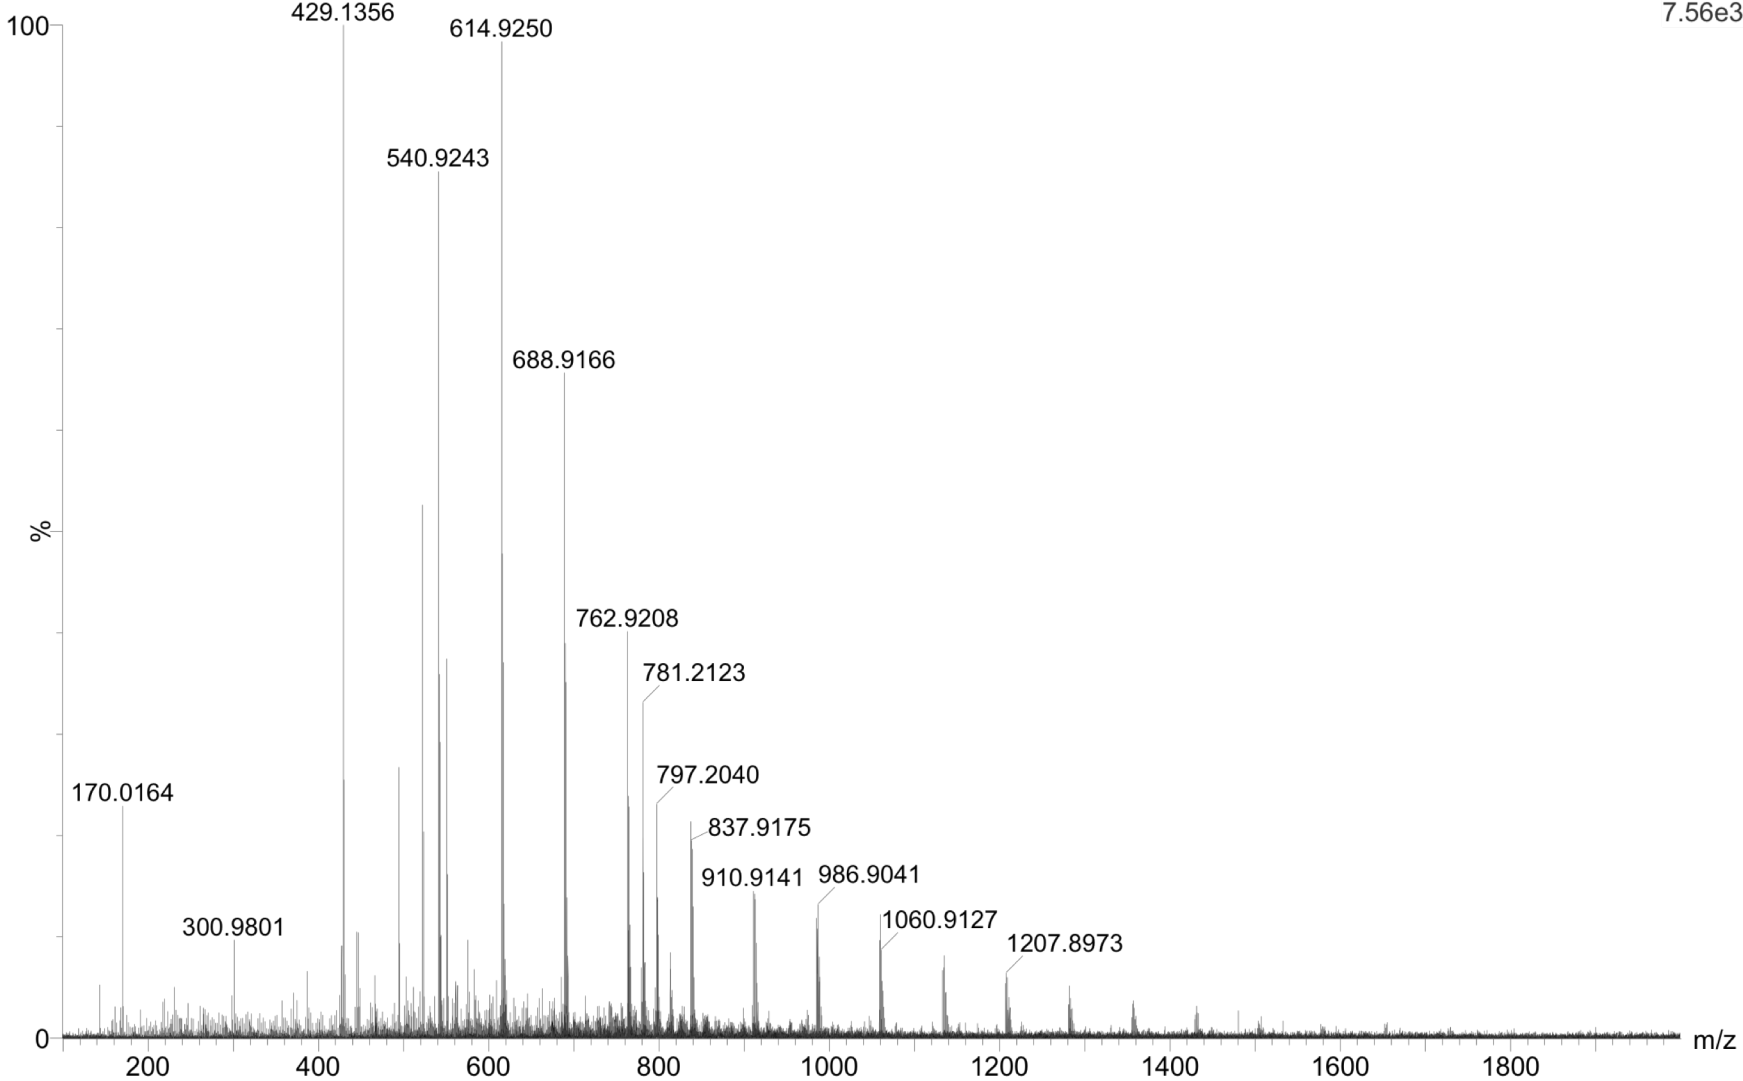

# Sample #7

## Ethanol Extract

07AUG2017\_MycoLProject\_PrePur\_7\_072417\_01 2 (0.051) Cm (2)

1: TOF MS ES+  
3.09e4

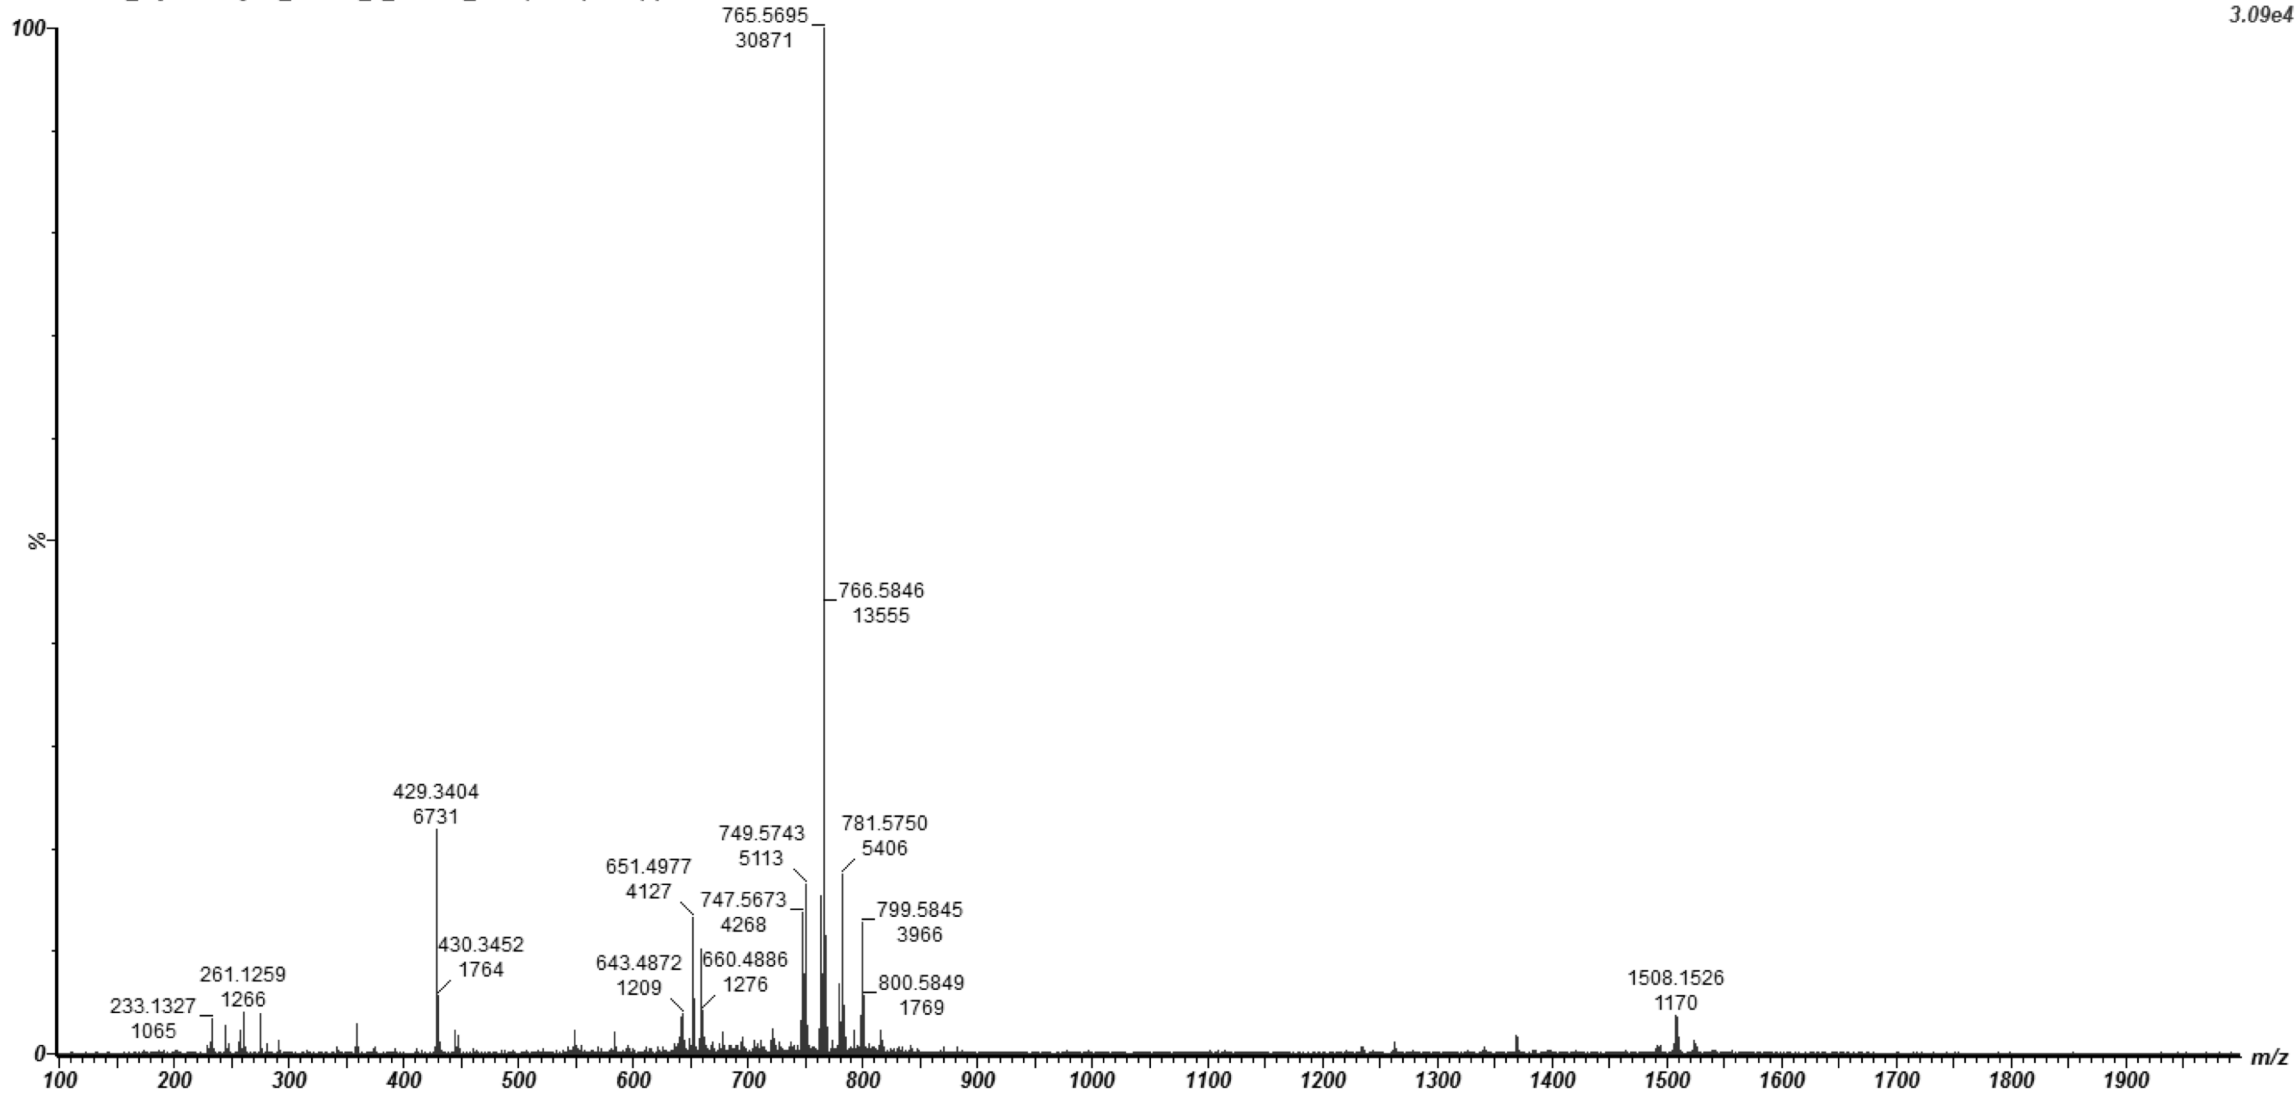



Sample #7  
TLC Purified

Myco PUR 7

31JAN2018\_MycoProject\_MYCO\_Purification7\_01 1 (0.034)

1: TOF MS ES+  
2.98e4

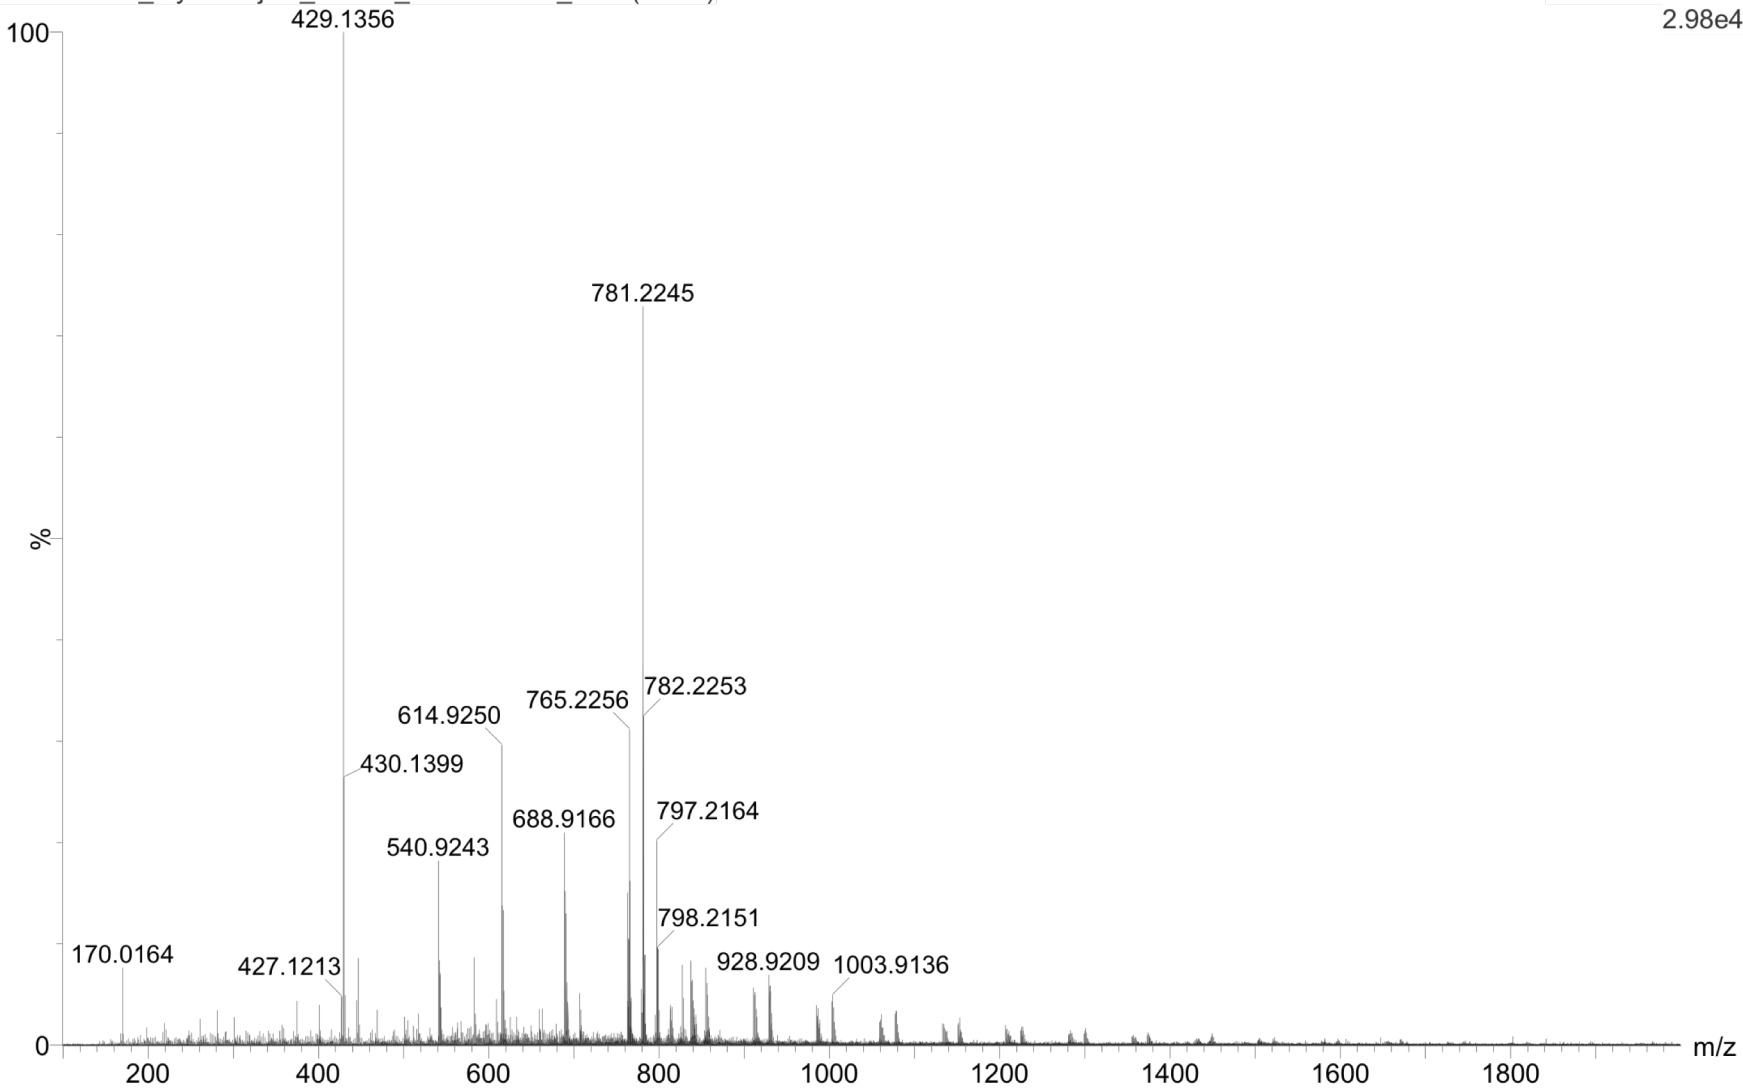

# Sample #8 Ethanol Extract

07AUG2017\_MycoLProject\_PrePur\_8\_072417\_01 2 (0.051) Cm (2)

1: TOF MS ES+  
9.93e4

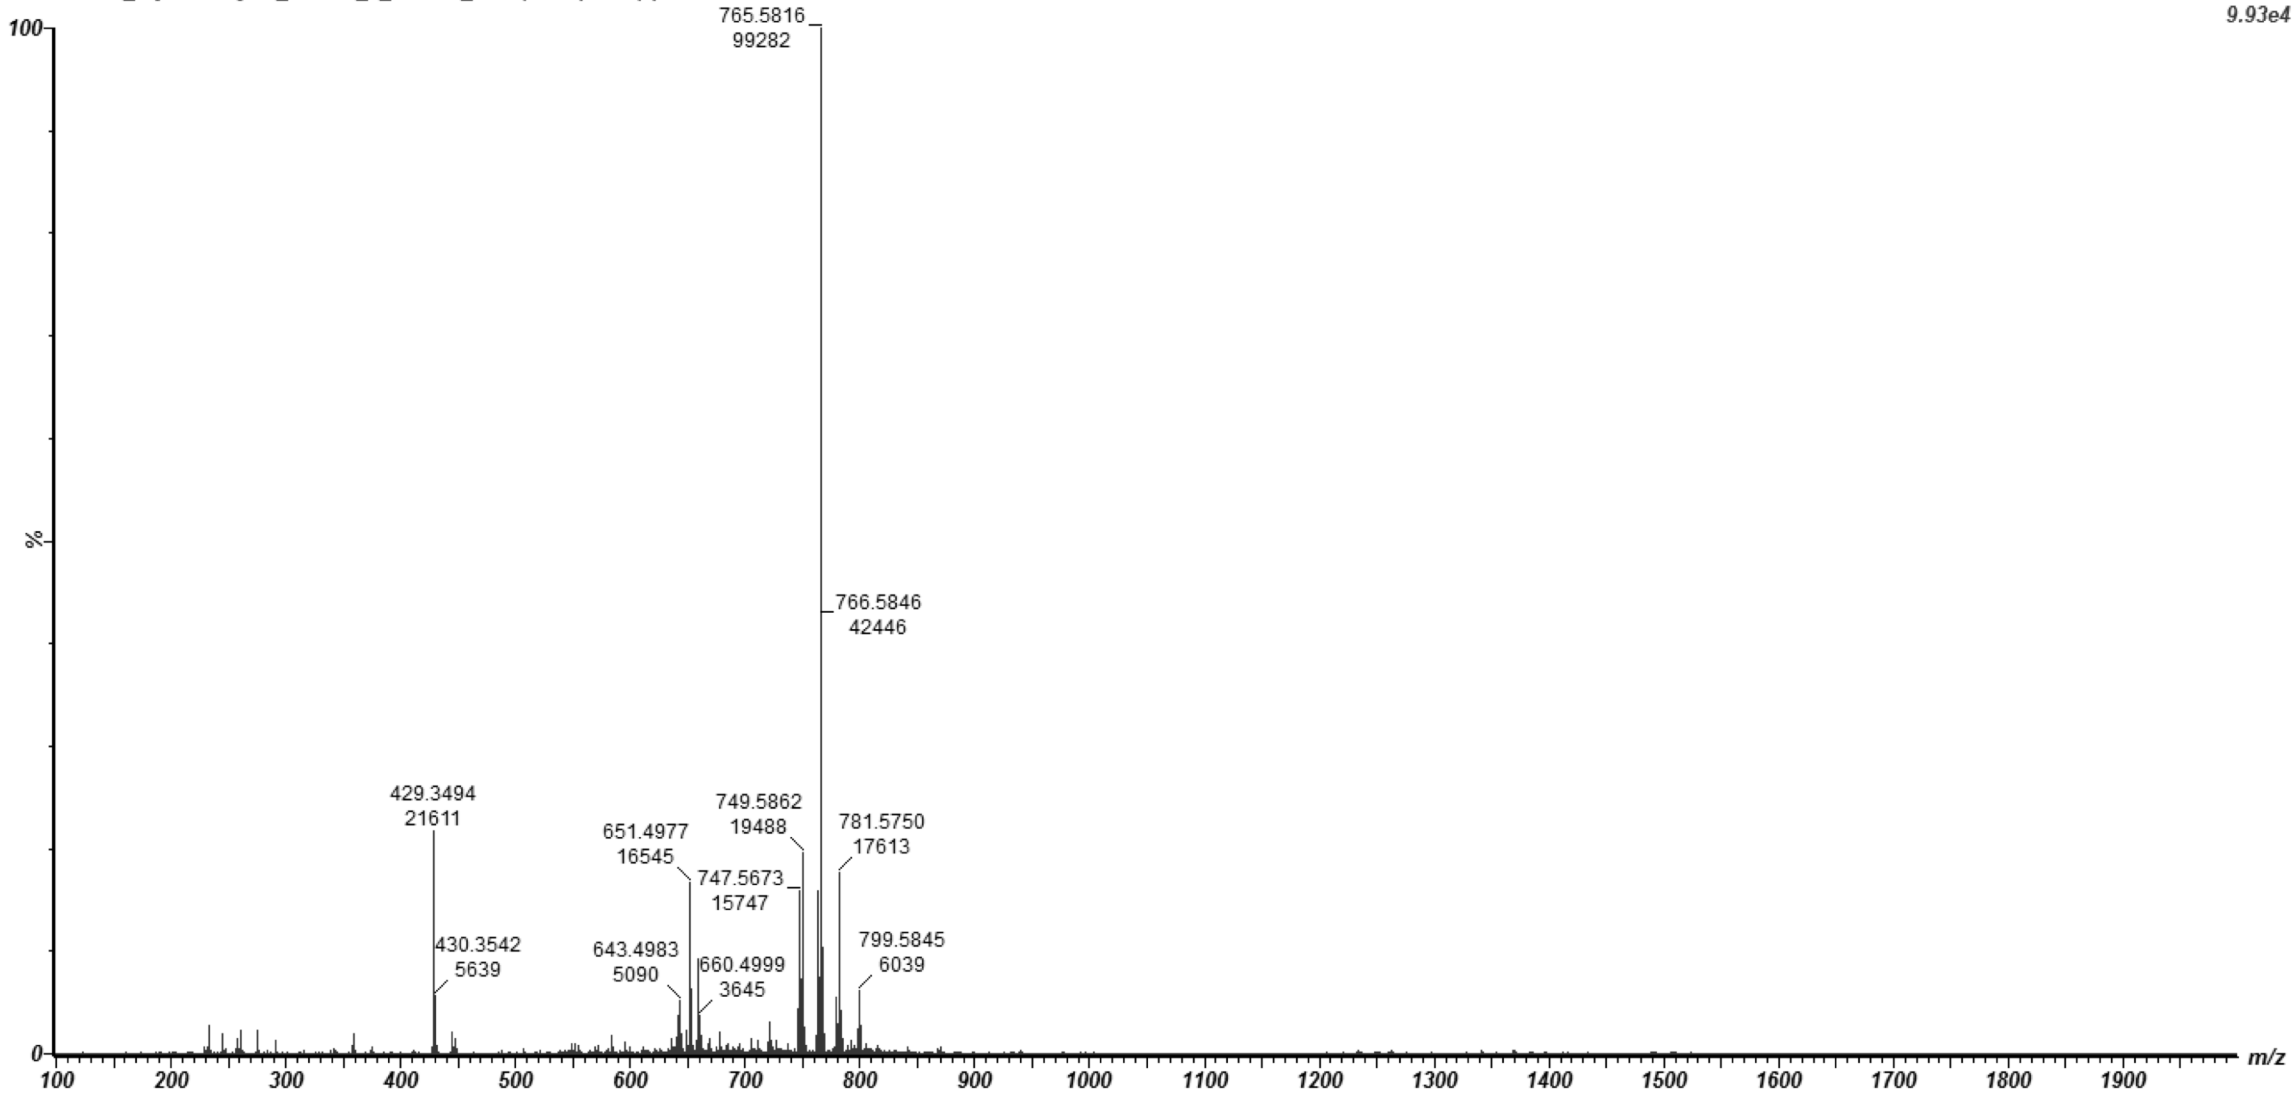

Sample #8  
TLC Purified

Myco PUR 8  
31JAN2018\_MycoProject\_MYCO\_Purification8\_01 1 (0.034)

1: TOF MS ES+  
1.88e5

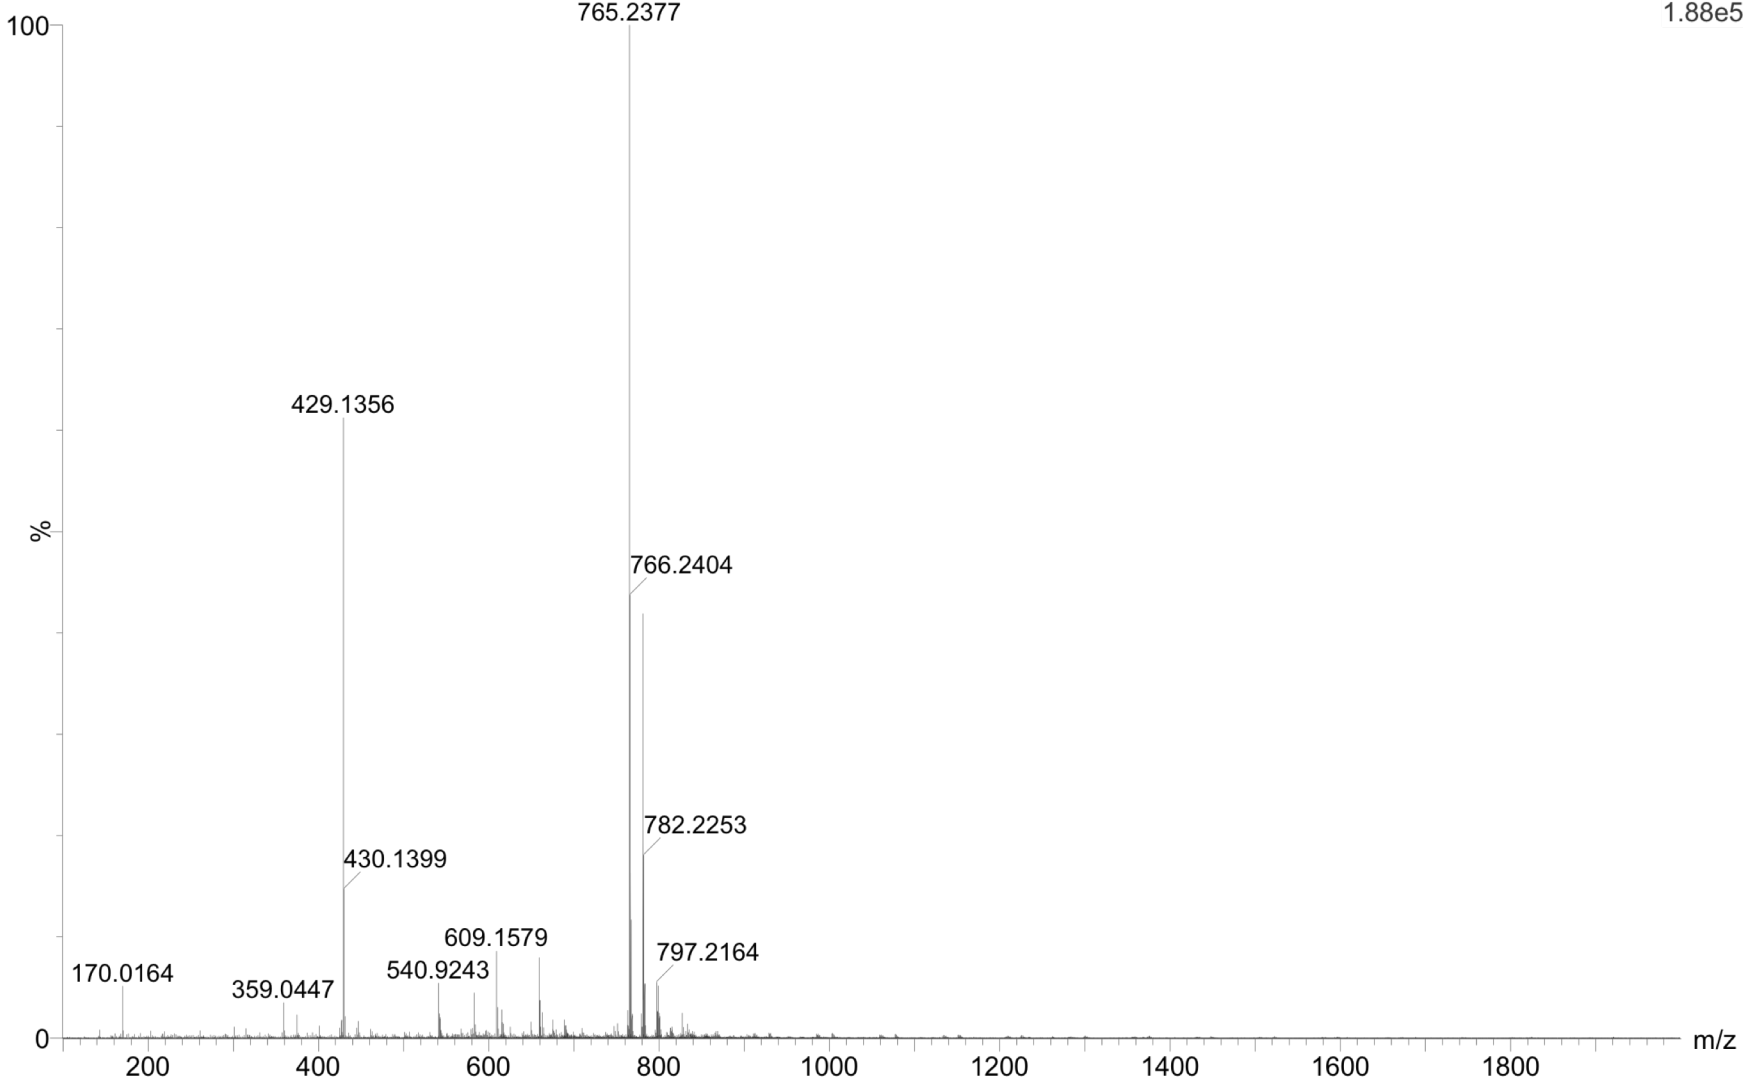

# Sample #9

## Ethanol Extract

07AUG2017\_MycoLProject\_PrePur\_9\_072417\_01 2 (0.051) Cm (2)

1: TOF MS ES+  
8.12e3

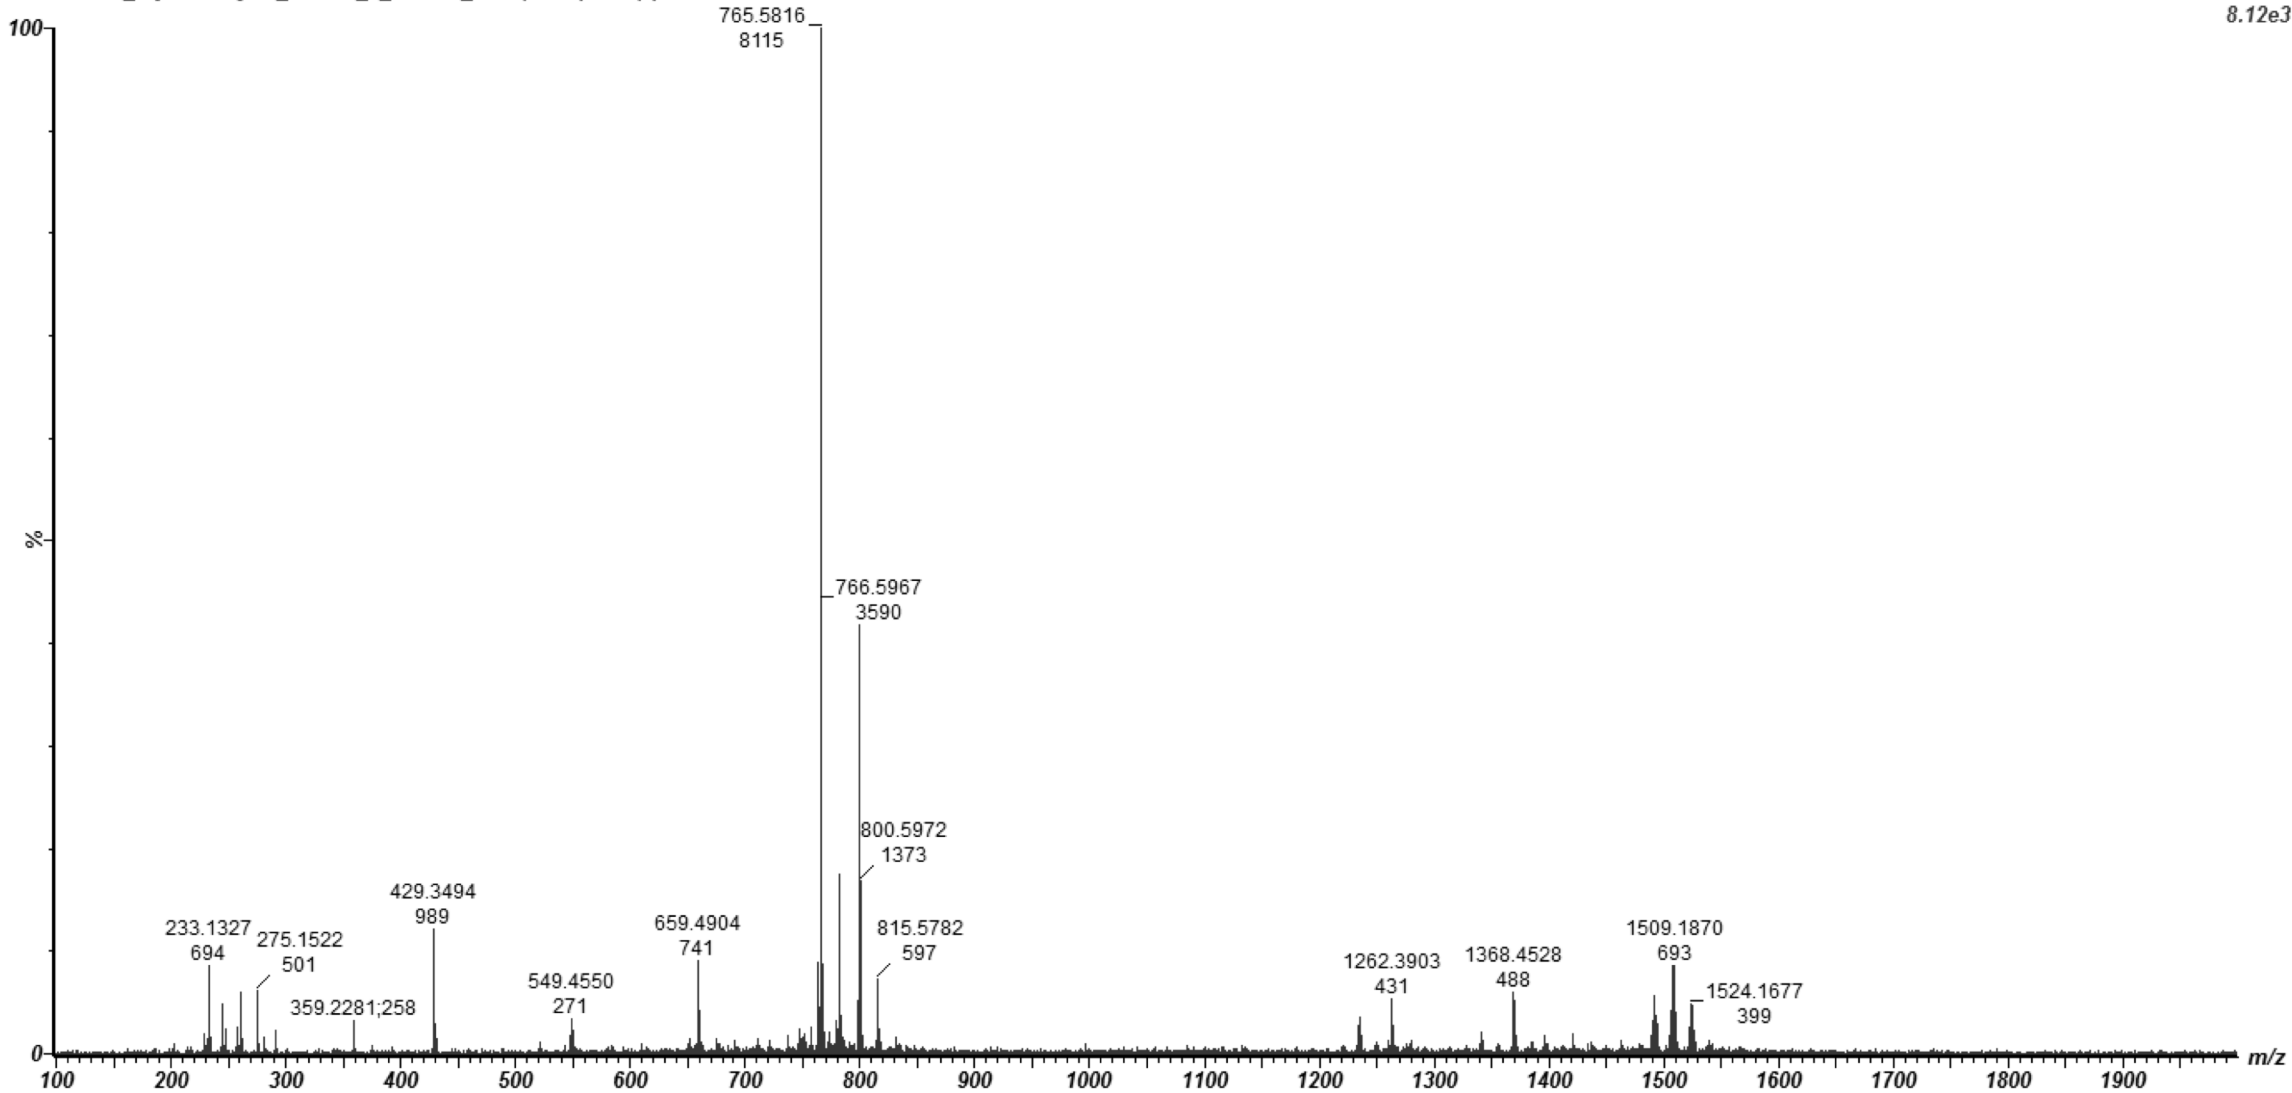

Sample #9  
TLC Purified

Myco PUR 9  
31JAN2018\_MycoProject\_MYCO\_Purification9\_01 1 (0.034)

1: TOF MS ES+  
4.87e4

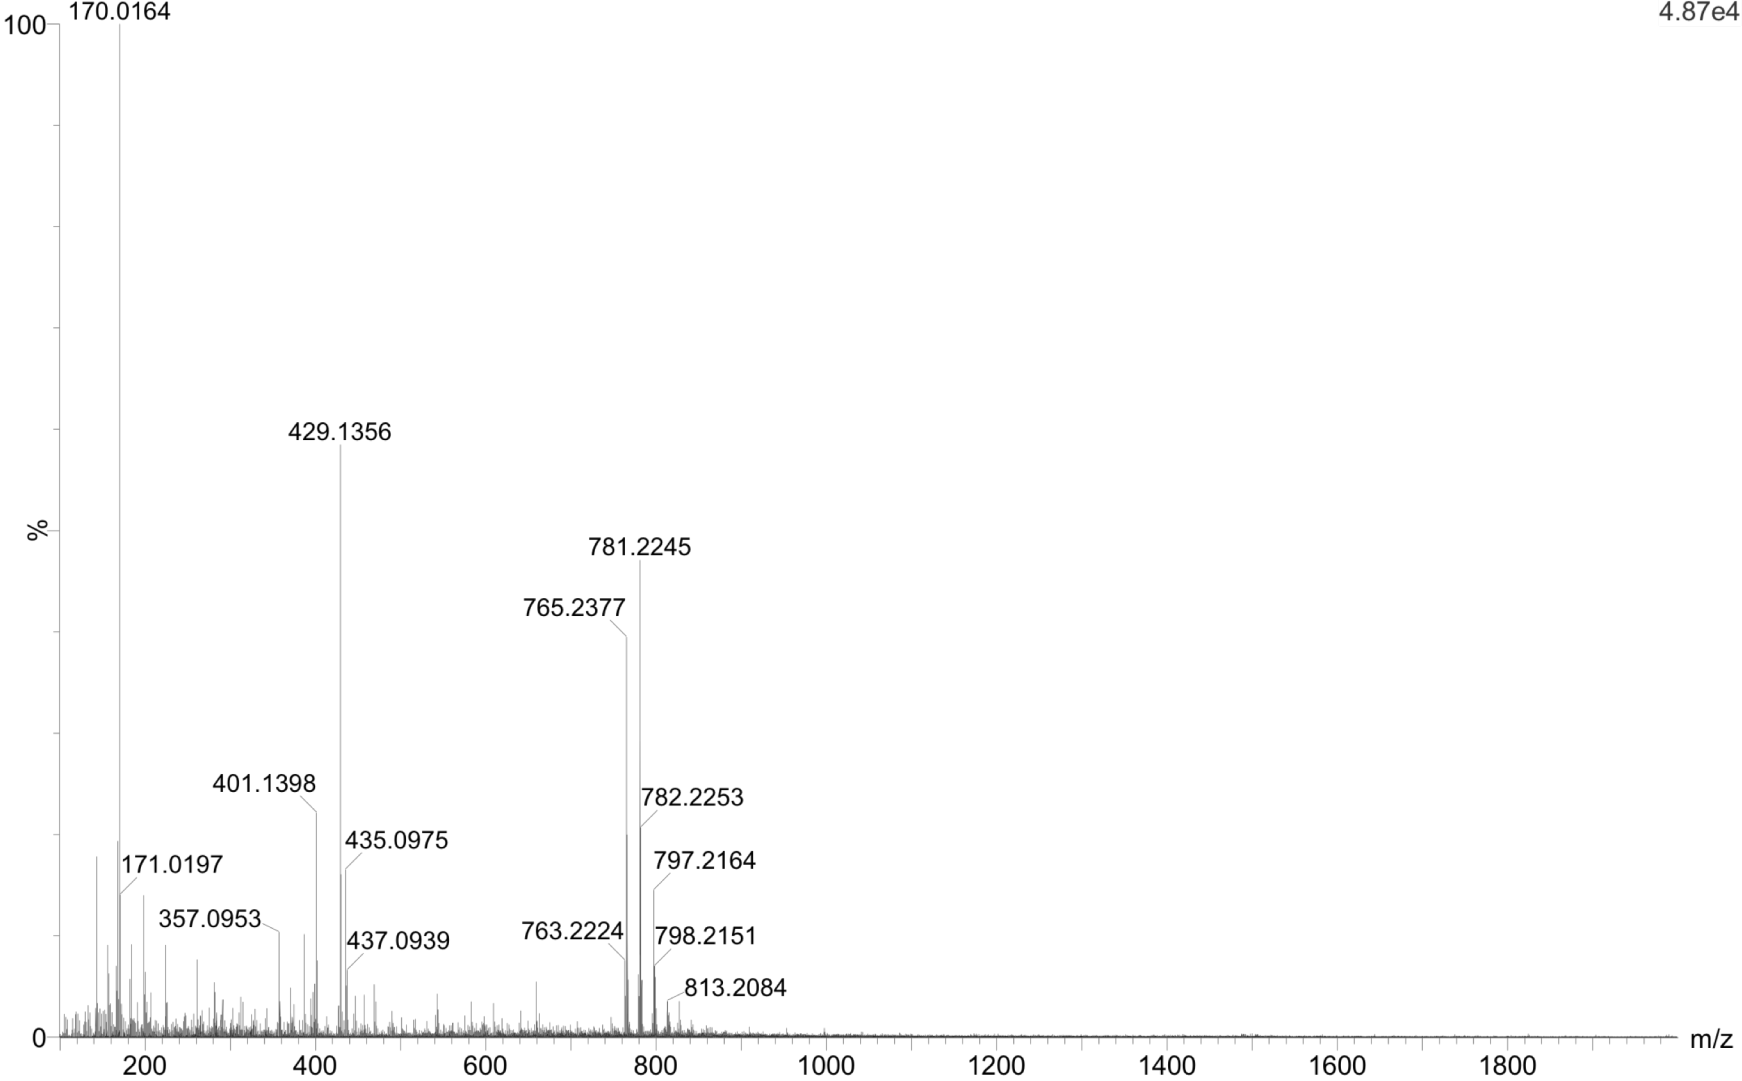

# Sample #10

## Ethanol Extract

07AUG2017\_MycoLProject\_PrePur\_10\_072417\_01 2 (0.051) Cm (2)

1: TOF MS ES+  
1.36e5

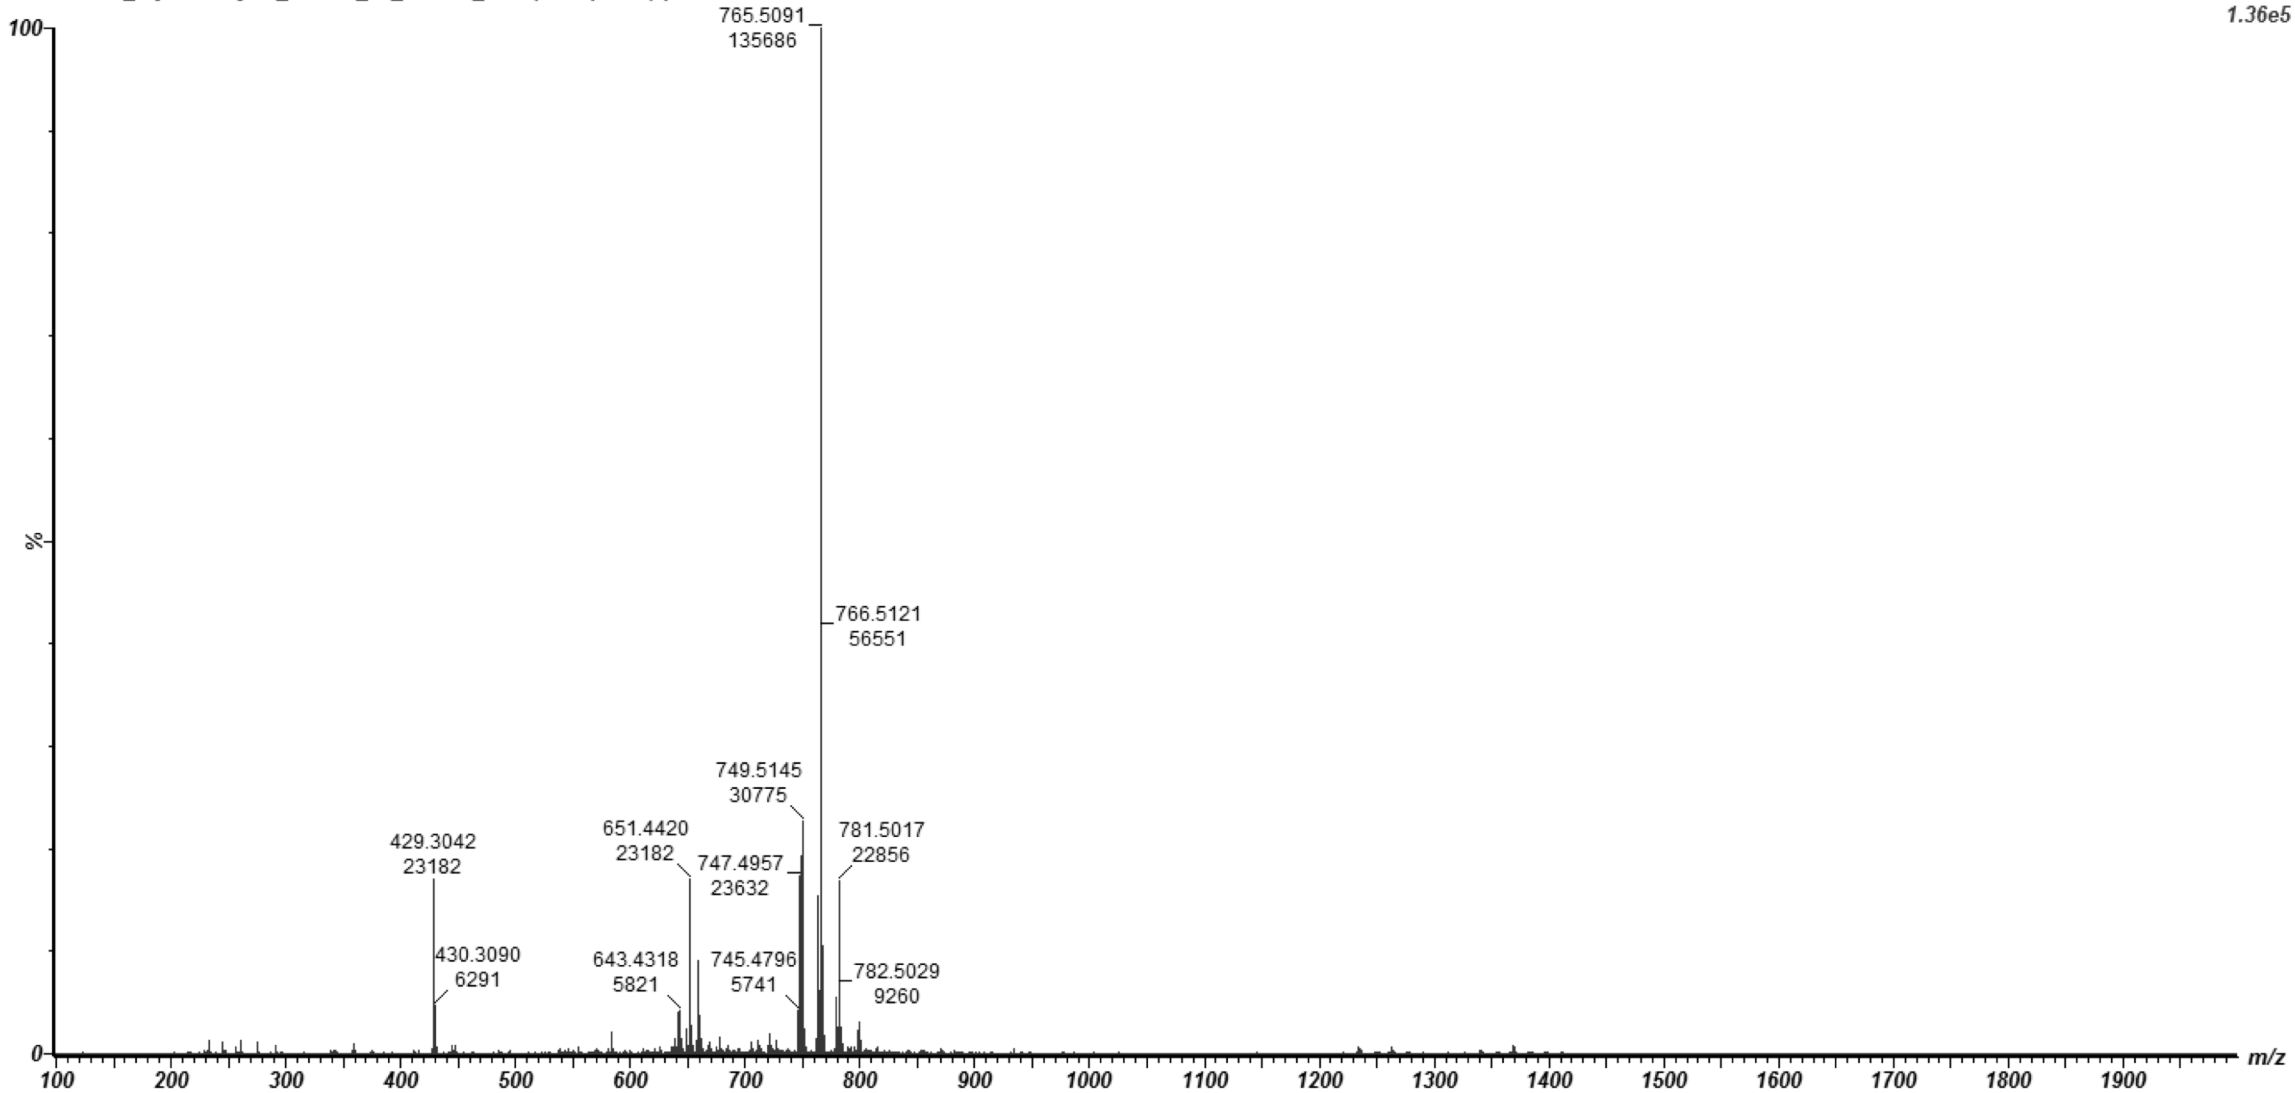

Sample #10  
TLC Purified

Myco PUR 10  
31JAN2018\_MycoProject\_MYCO\_Purification10\_01 1 (0.034)

1: TOF MS ES+  
1.23e4

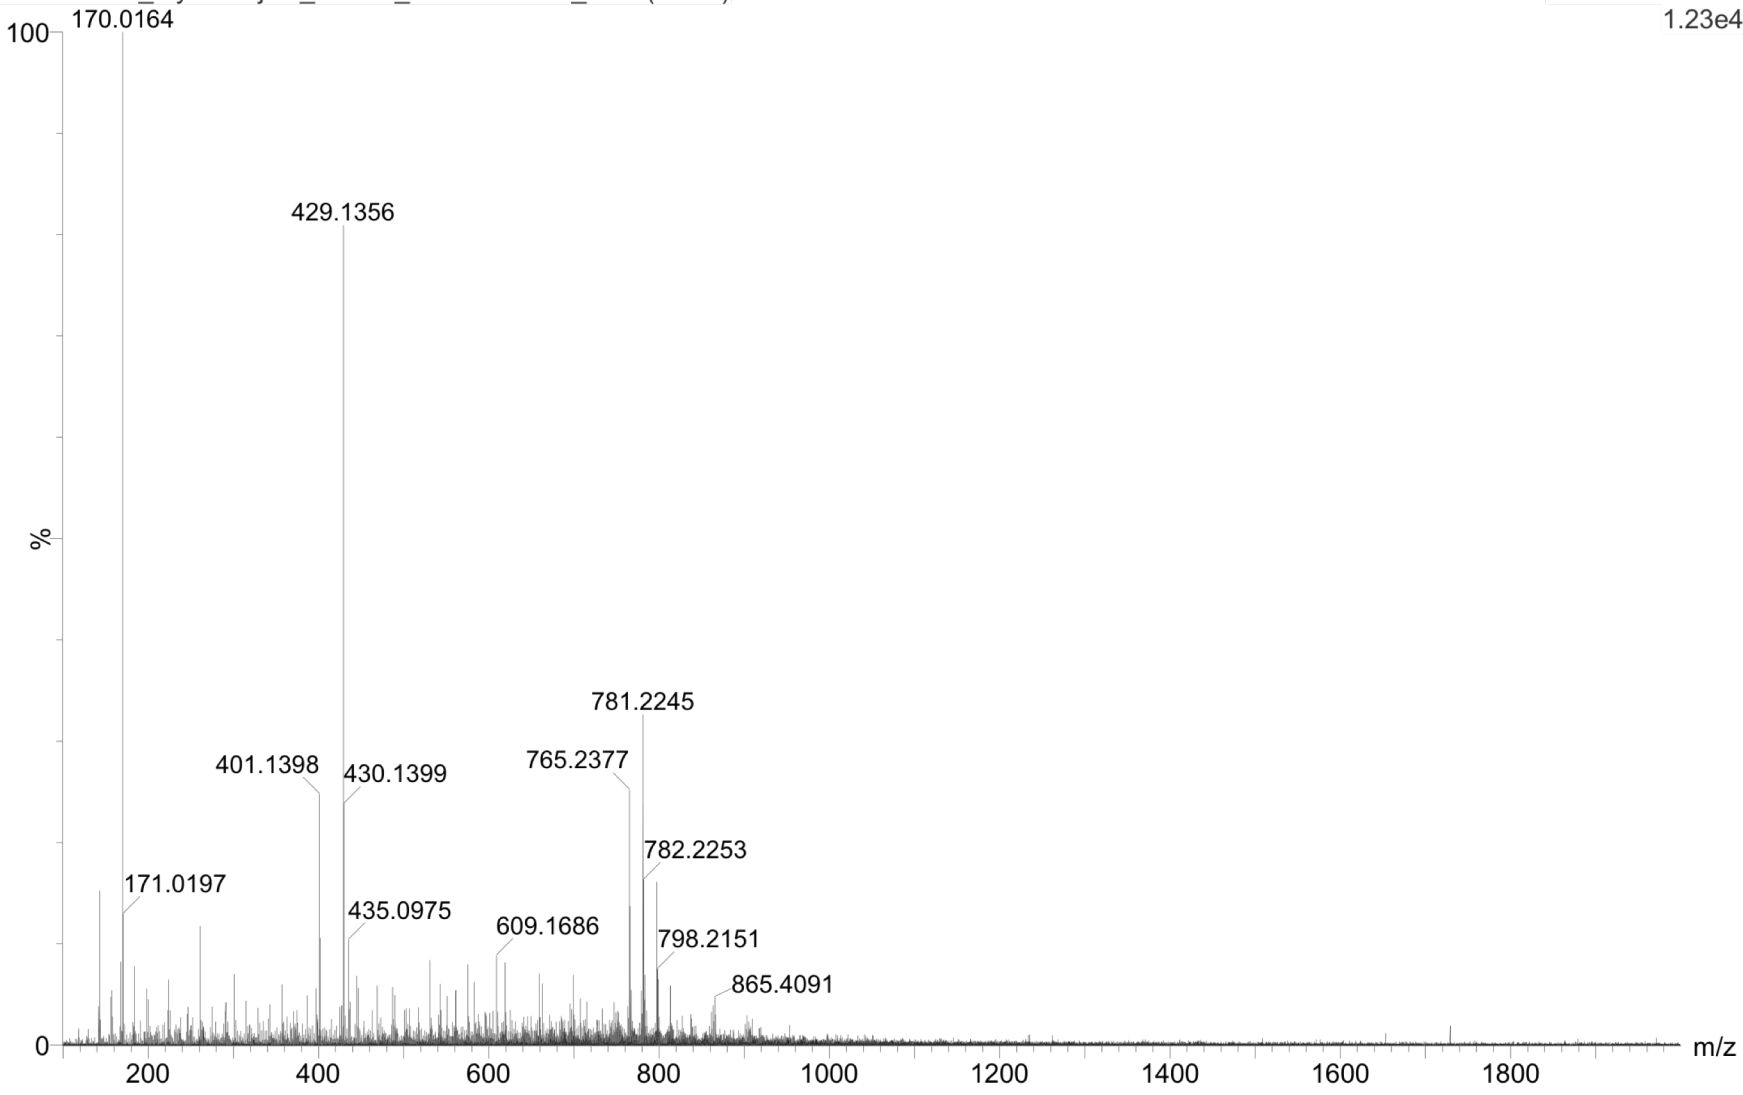

# Sample #11

## Ethanol Extract

07AUG2017\_MycoLProject\_PrePur\_11\_072417\_01 2 (0.051) Cm (2)

1: TOF MS ES+  
5.81e5

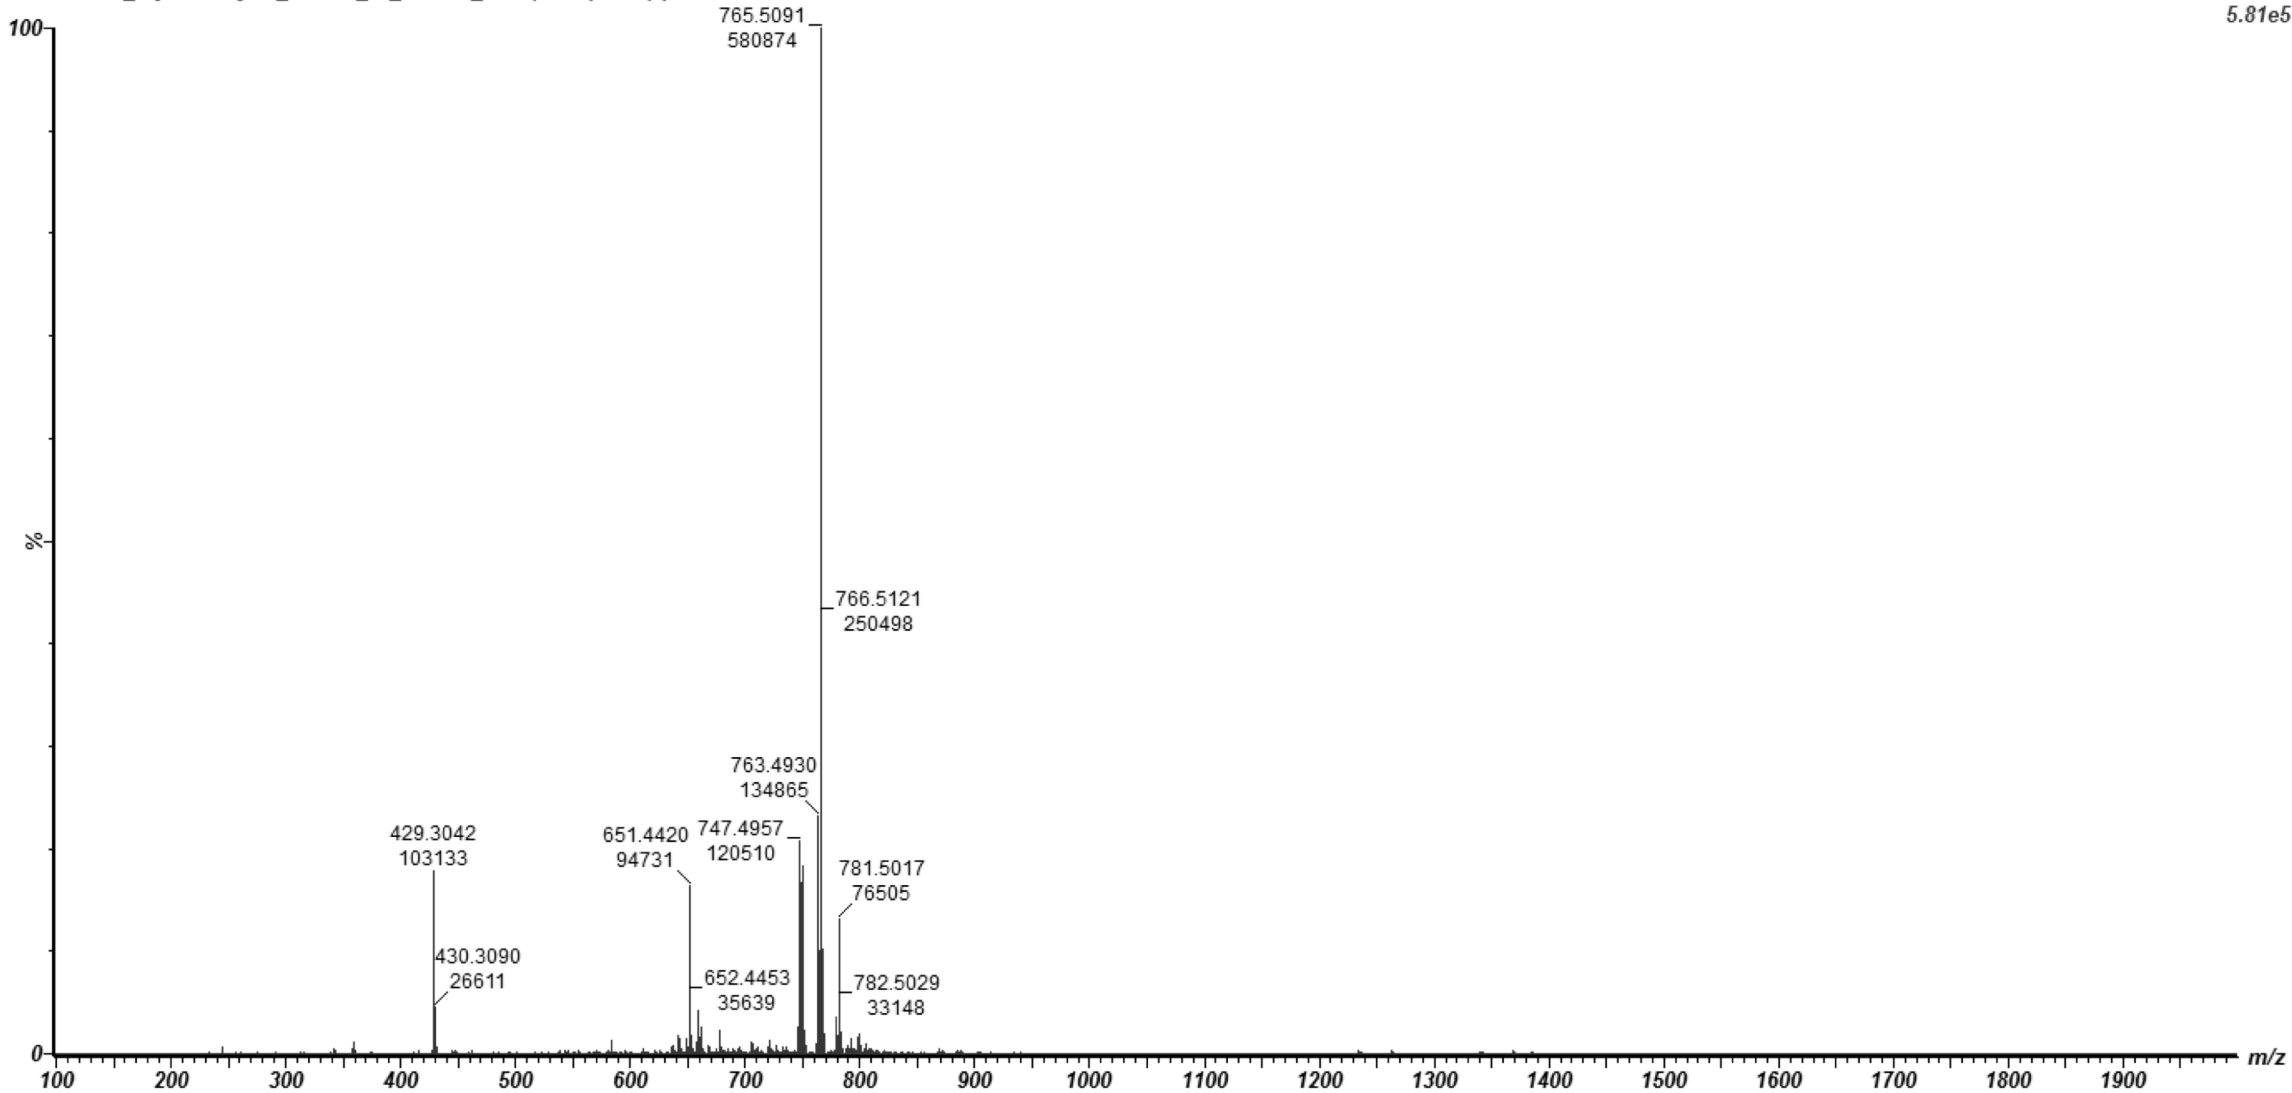



Sample #11  
TLC Purified

Myco PUR 11

31JAN2018\_MycoProject\_MYCO\_Purification11\_01 1 (0.034)

1: TOF MS ES+  
1.42e5

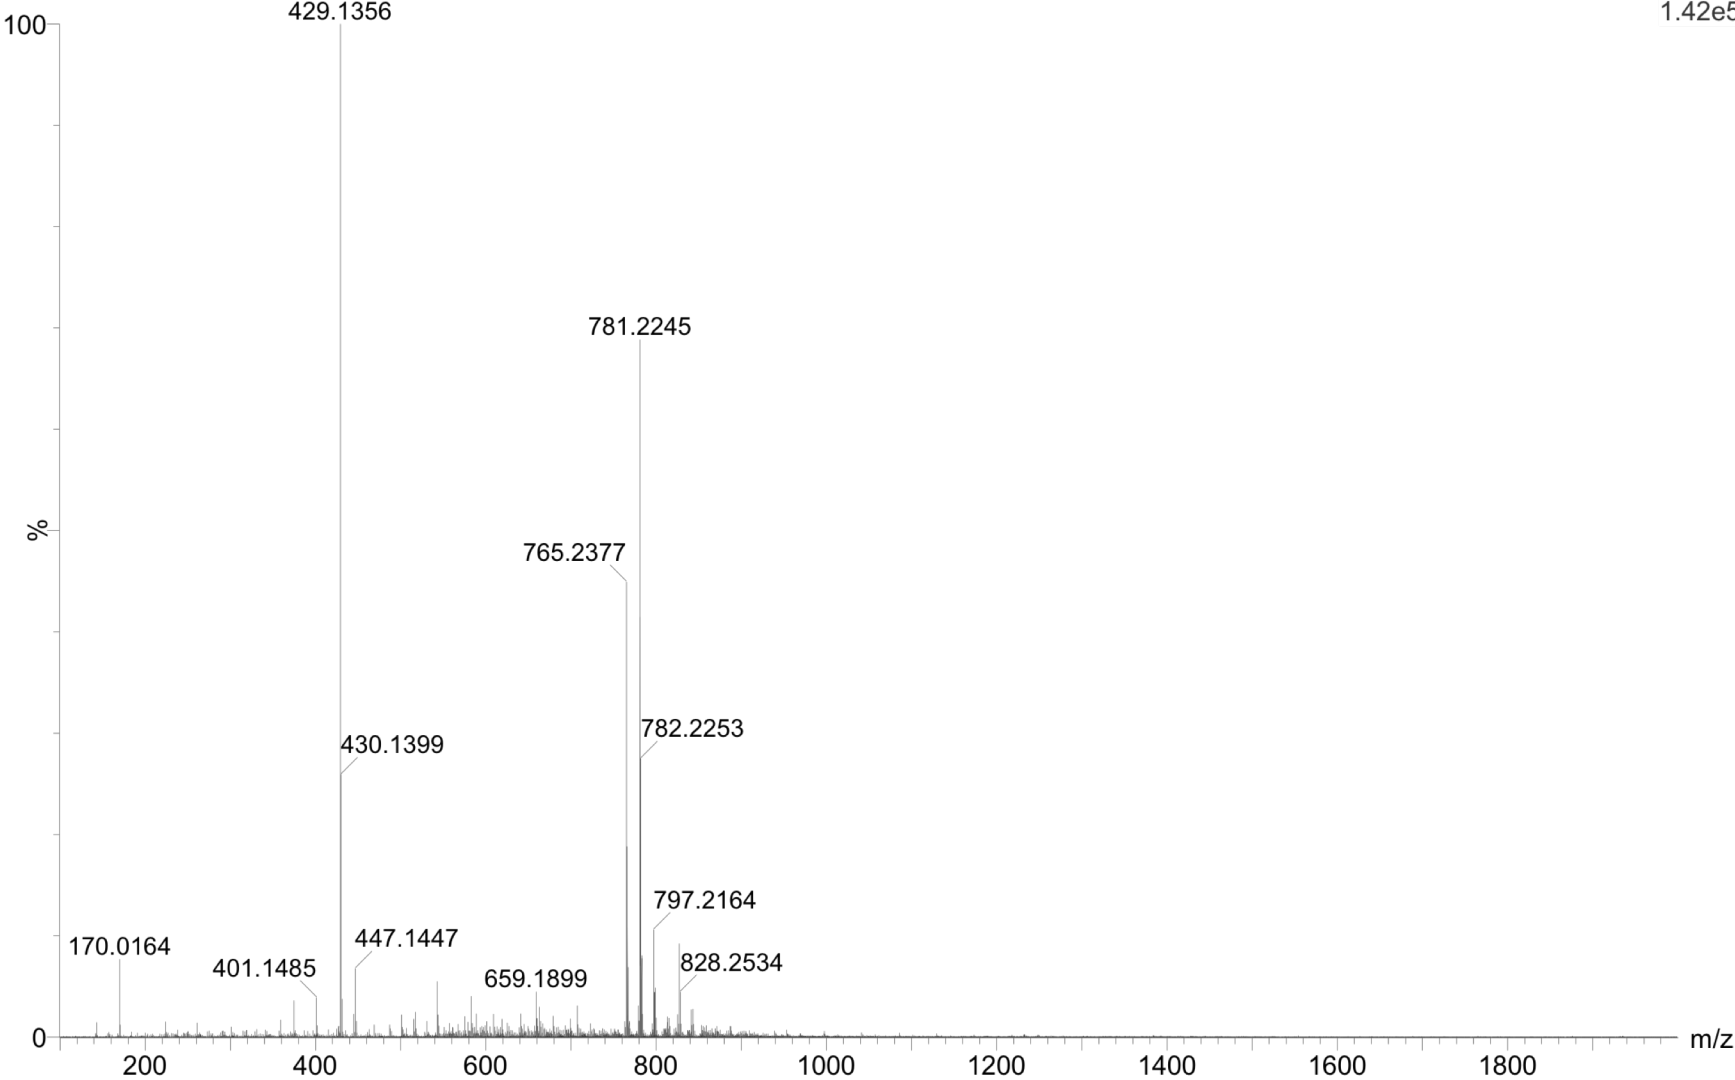

Supplement: s1 [file s1]
